# Supplementary material for: Functional status and spatial architecture of tumor-infiltrating CD8+ T cells are associated with lymph node metastases in non-small cell lung cancer
Source: Springer Nature journal article supplement (doi:10.1186/s12967-023-04154-y), 2023-05-12

# Supplementary file-2

## **Functional status and spatial architecture of tumor-infiltrating CD8<sup>+</sup> T cells are associated with lymph node metastases in non-small cell lung cancer**

Guanqun Yang<sup>#</sup>, Siqu Cai<sup>#</sup>, Mengyu Hu, Chaozhuo Li, Liying Yang, Wei Zhang, Jujie Sun, Fenghao Sun, Ligang Xing, Xiaorong Sun<sup>\*</sup>

Overview of multiplex stained sections from all tissue microarray before and after fluorescence imaging

# Panel 1

## TMA 01

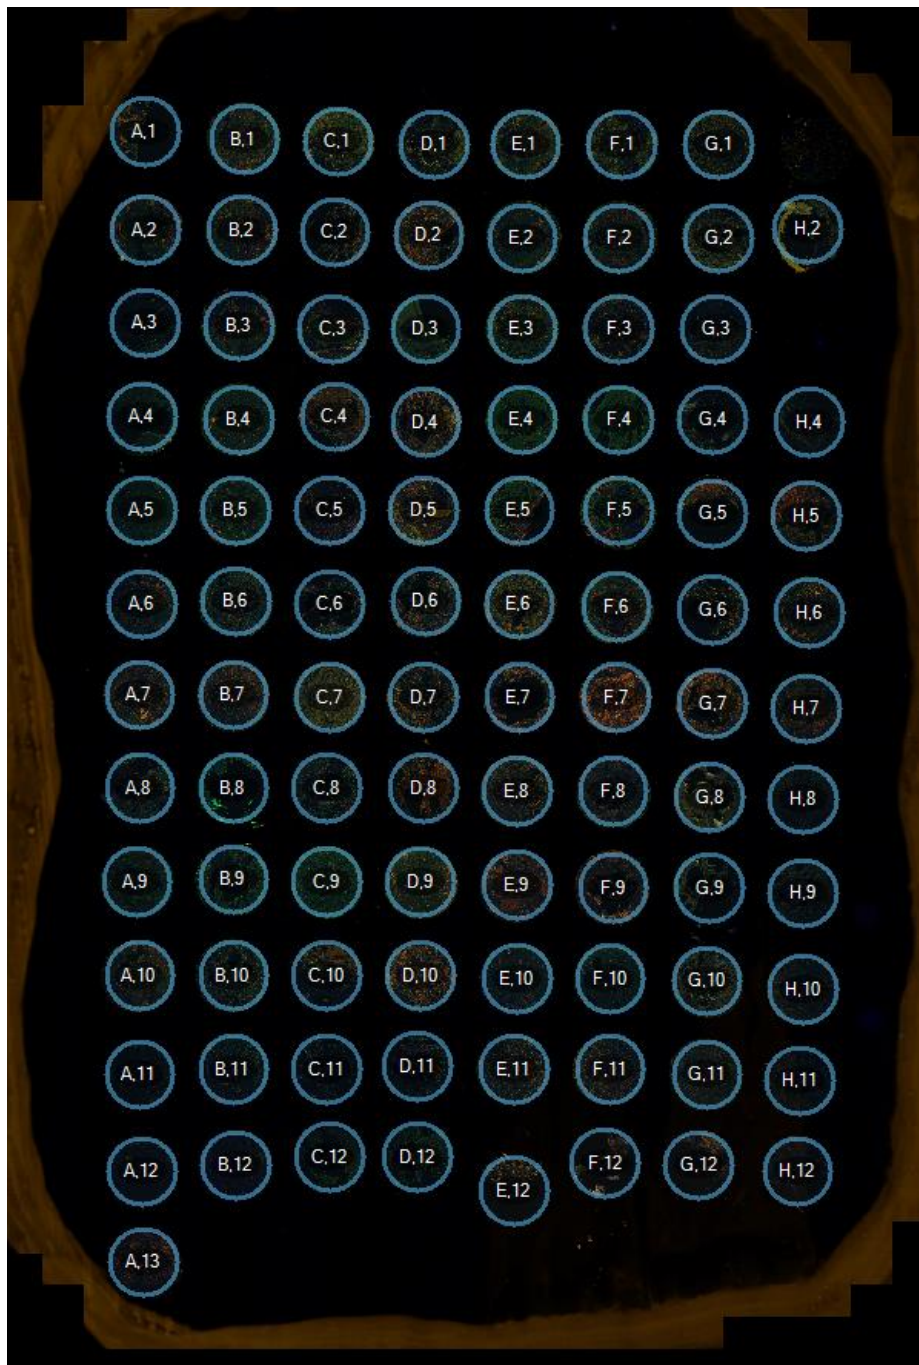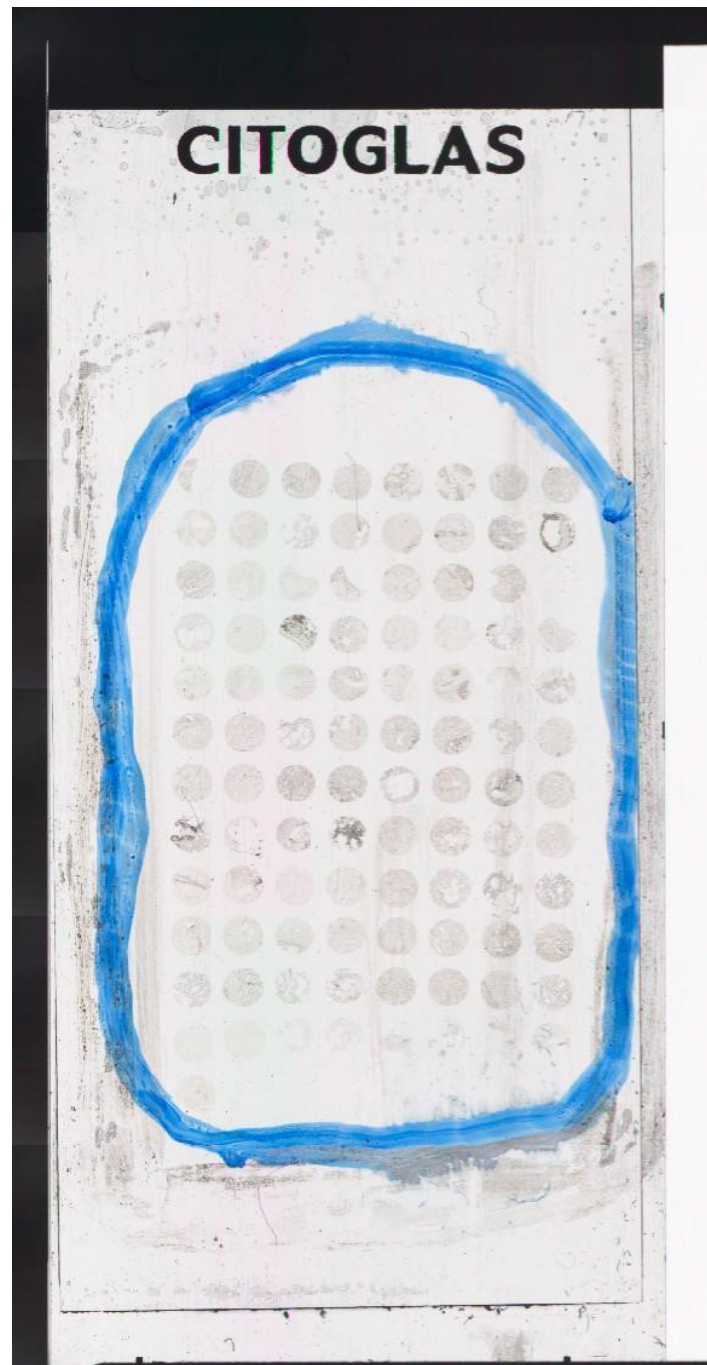

**Panel 1**  
**TMA 02**

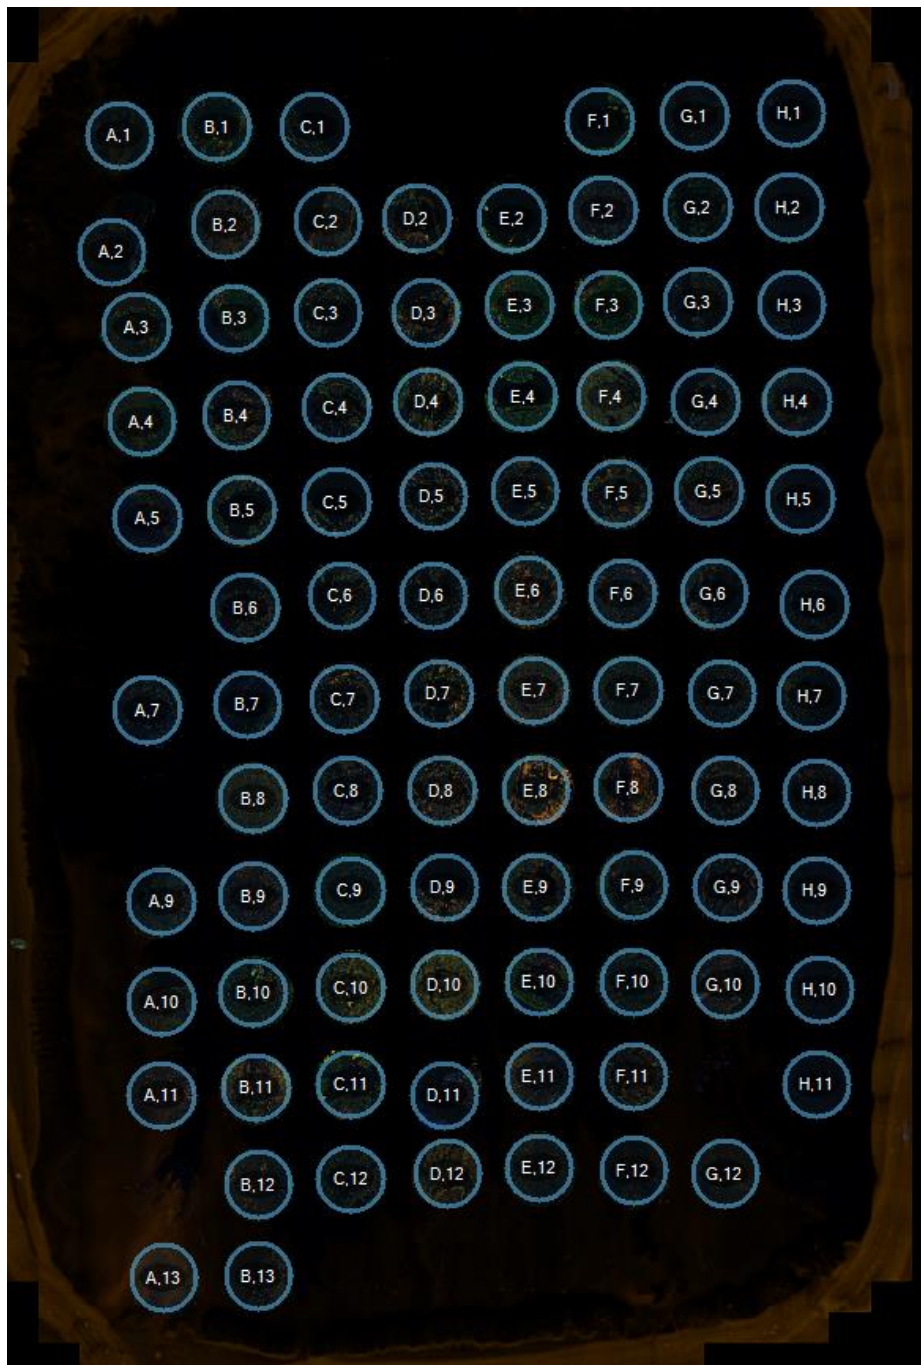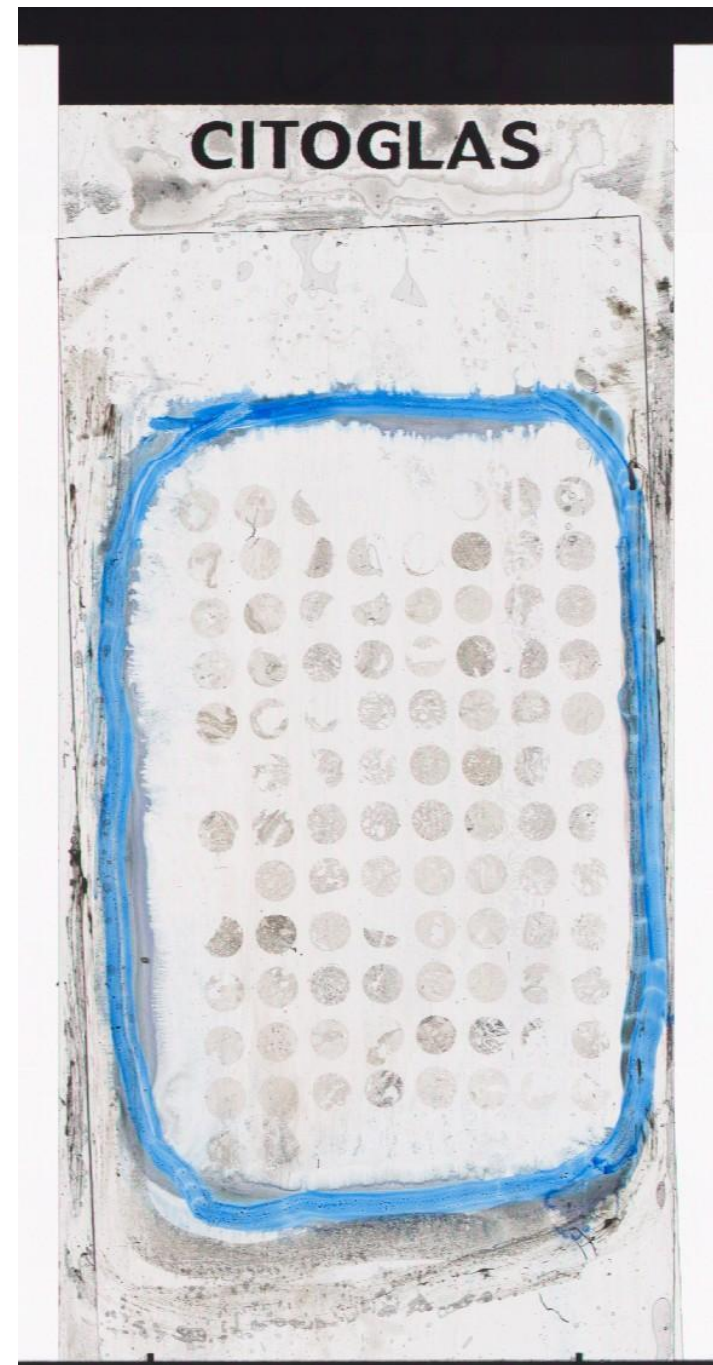

**Panel 1**  
**TMA 03**

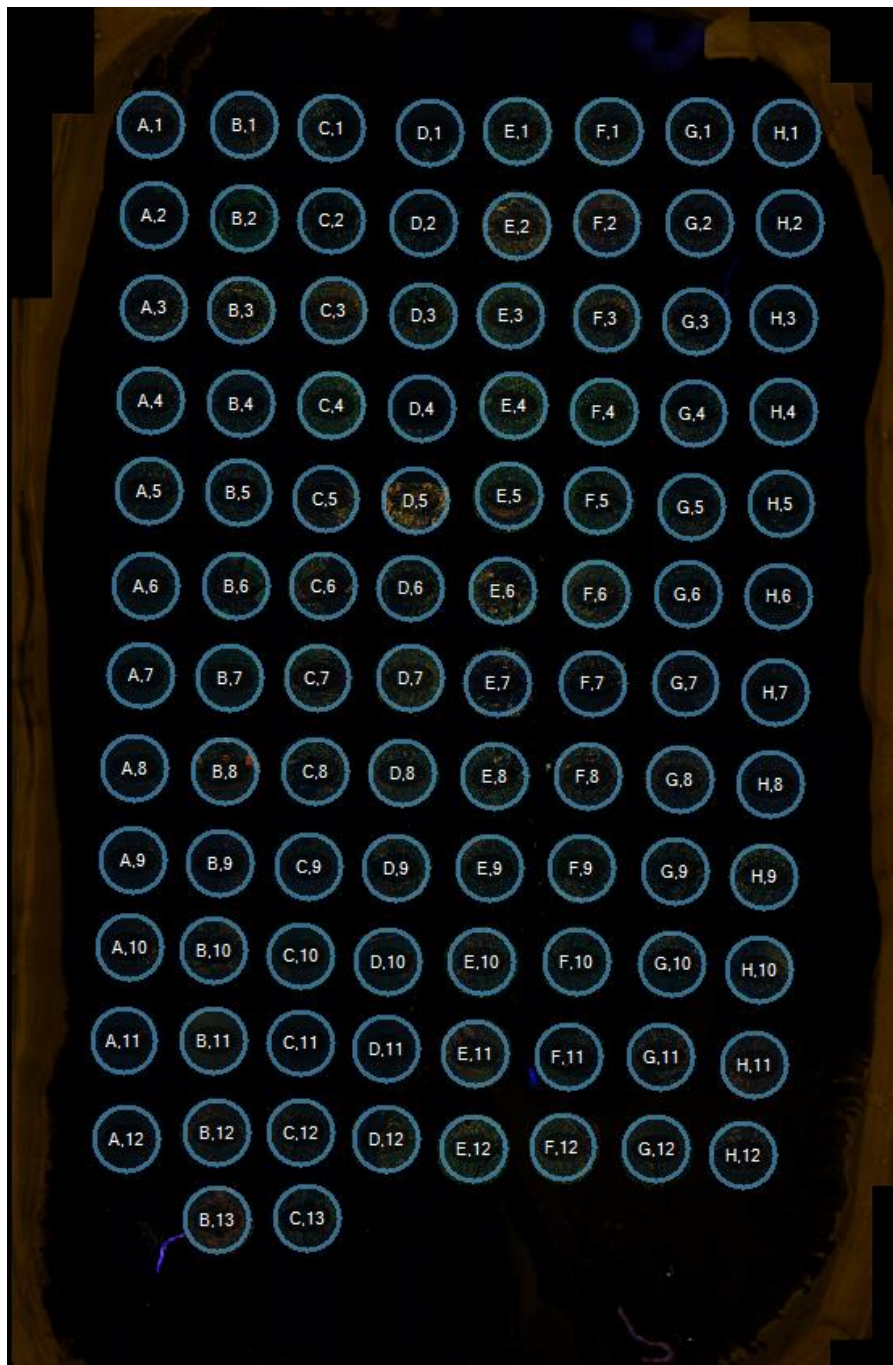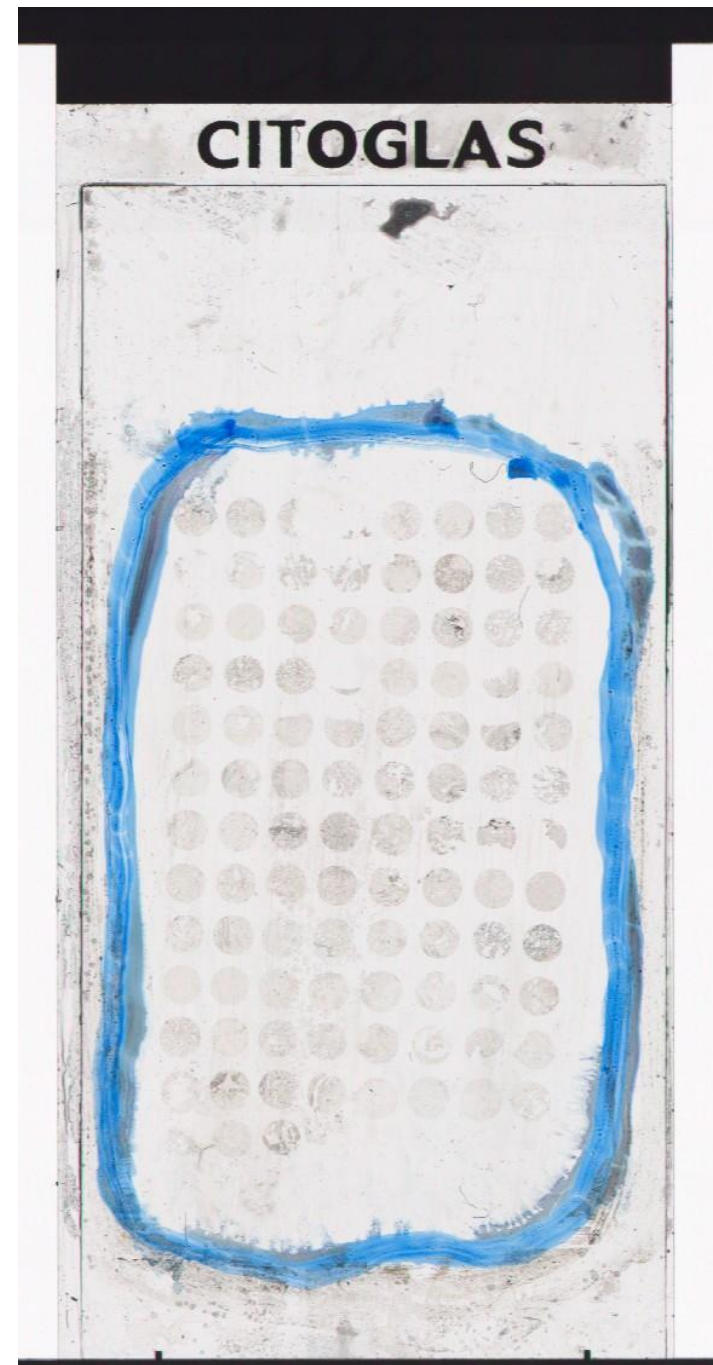

**Panel 1**  
**TMA 04**

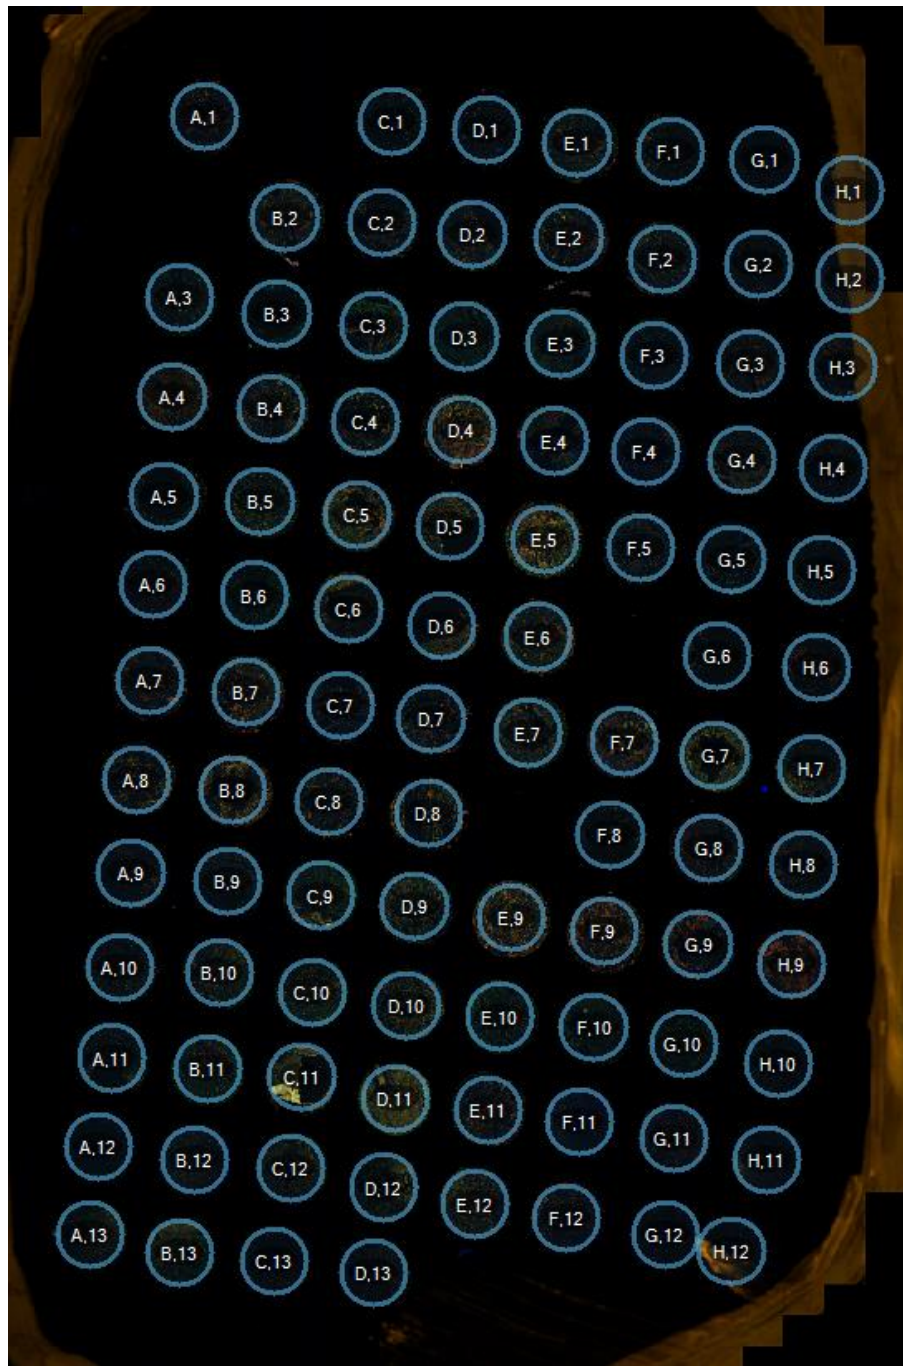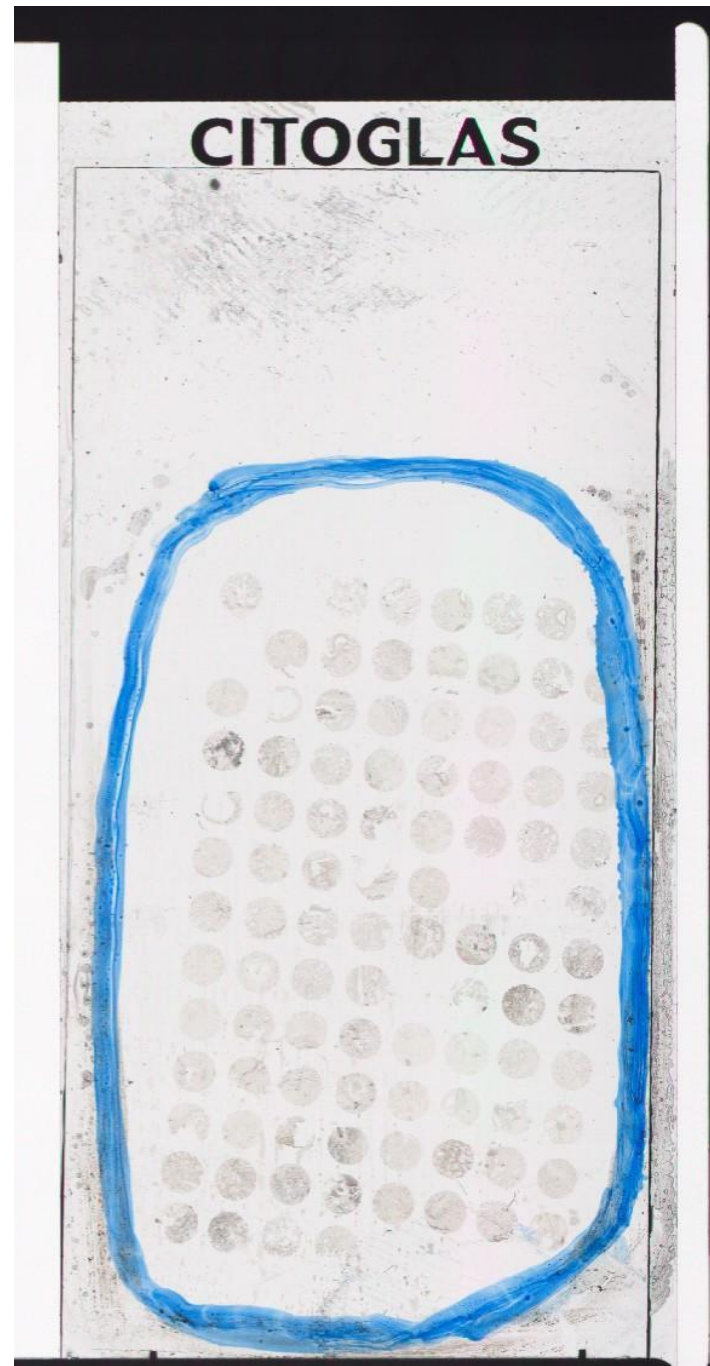

**Panel 1**  
**TMA 05**

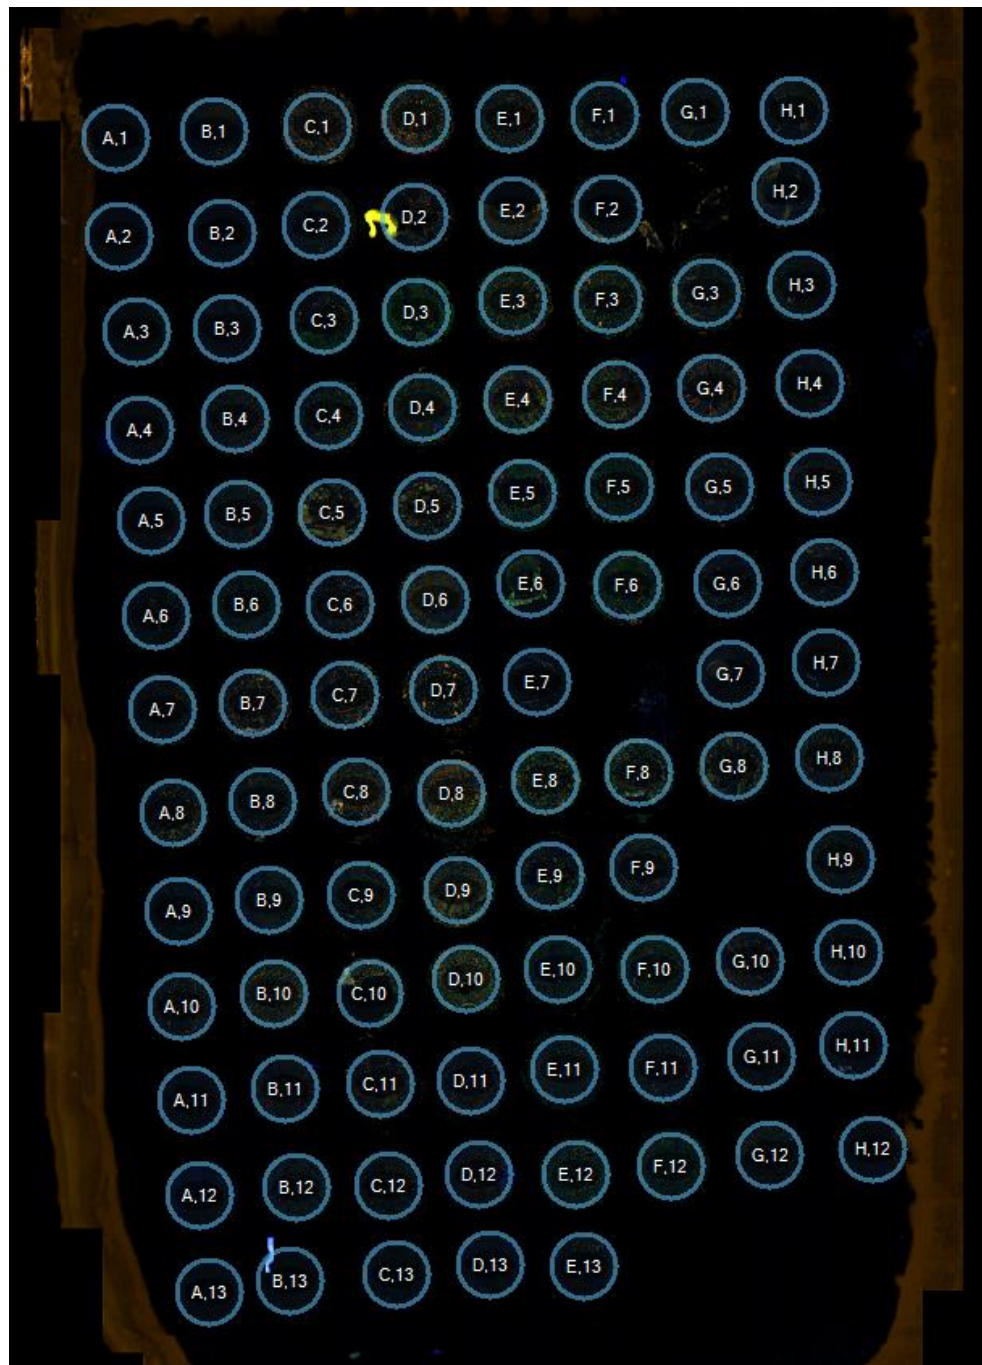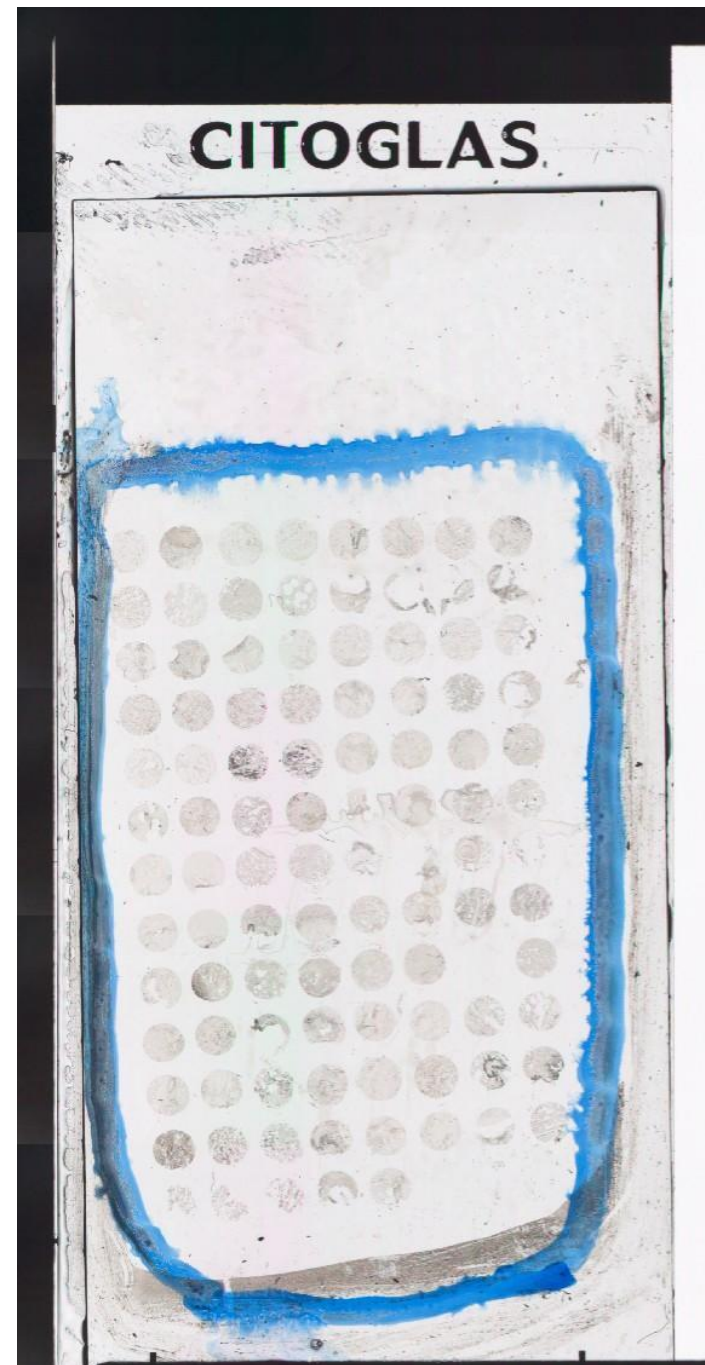

**Panel 1**  
**TMA 06**

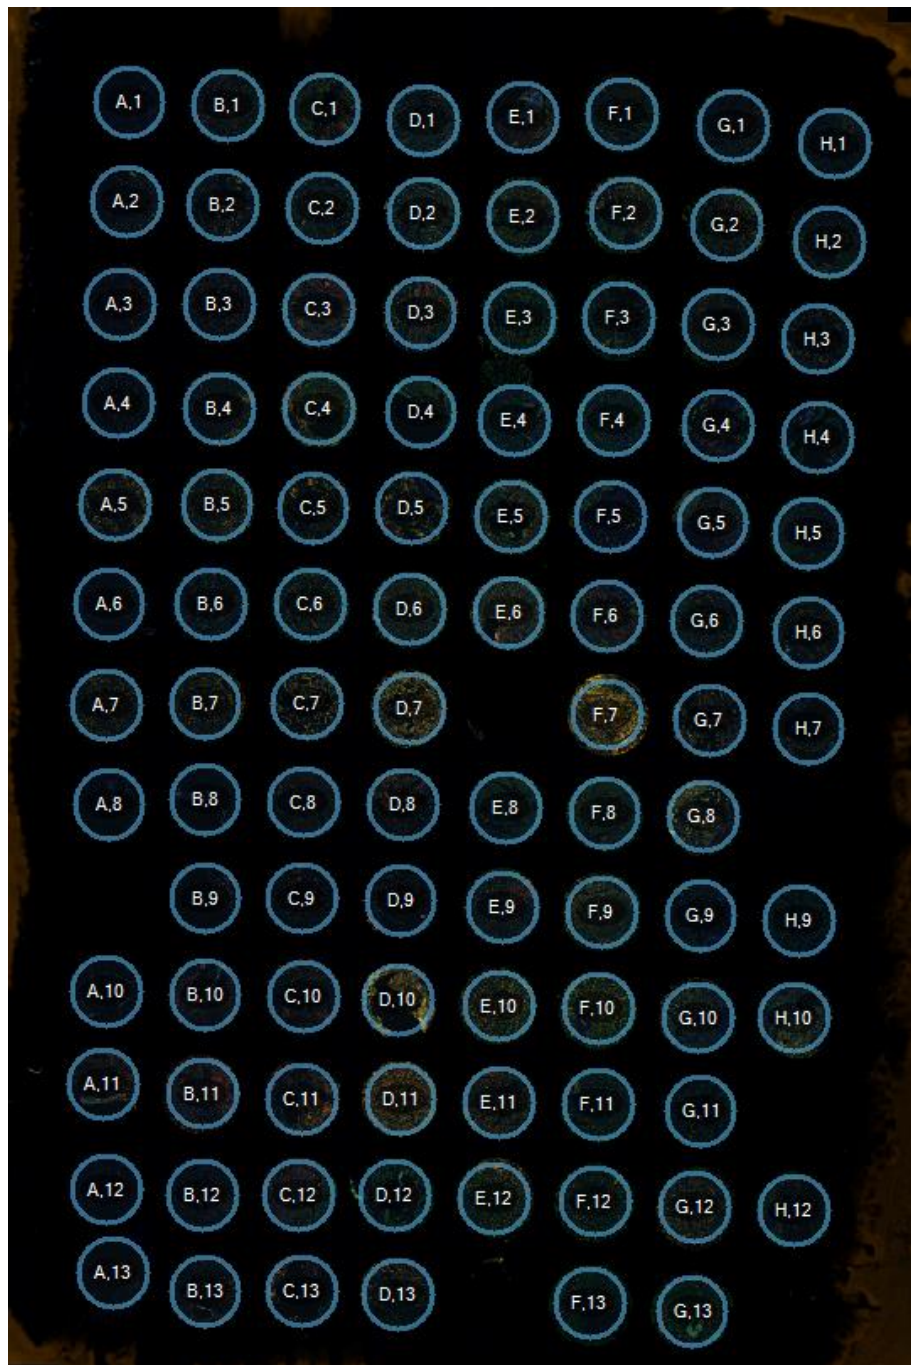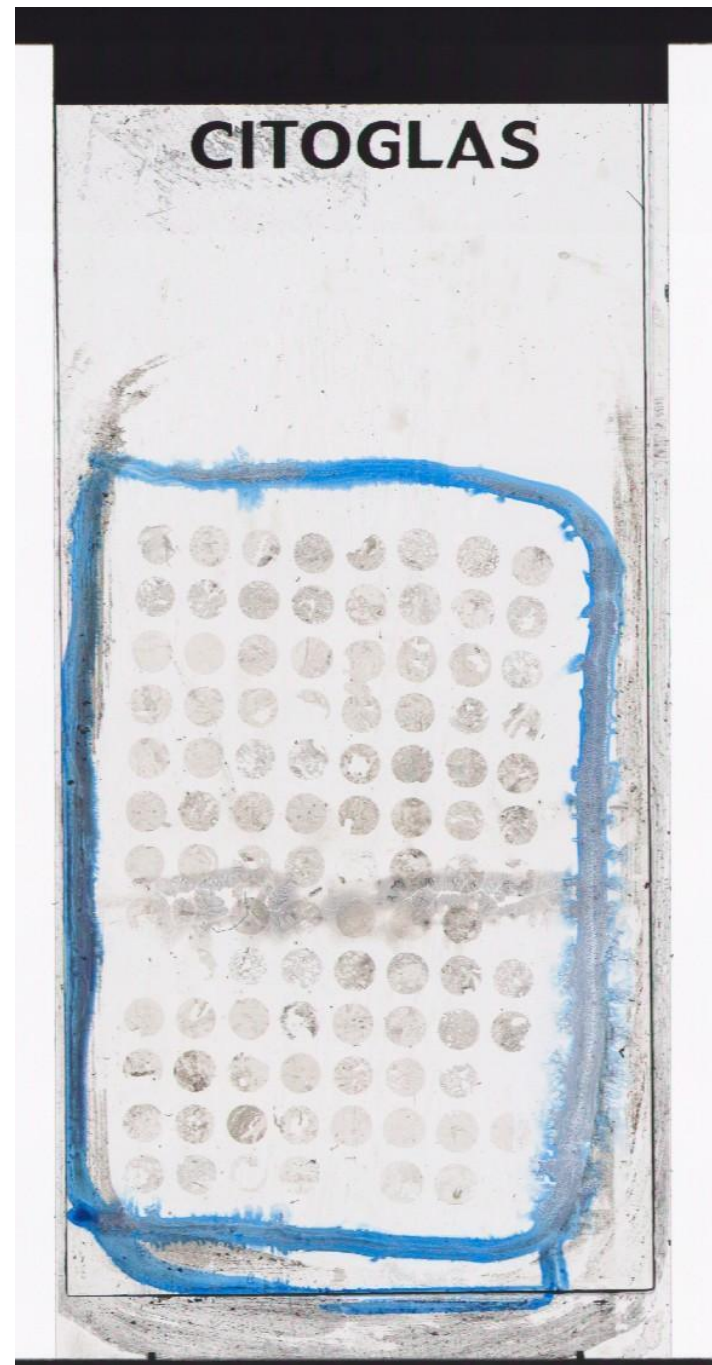

# Panel 1

TMA 07

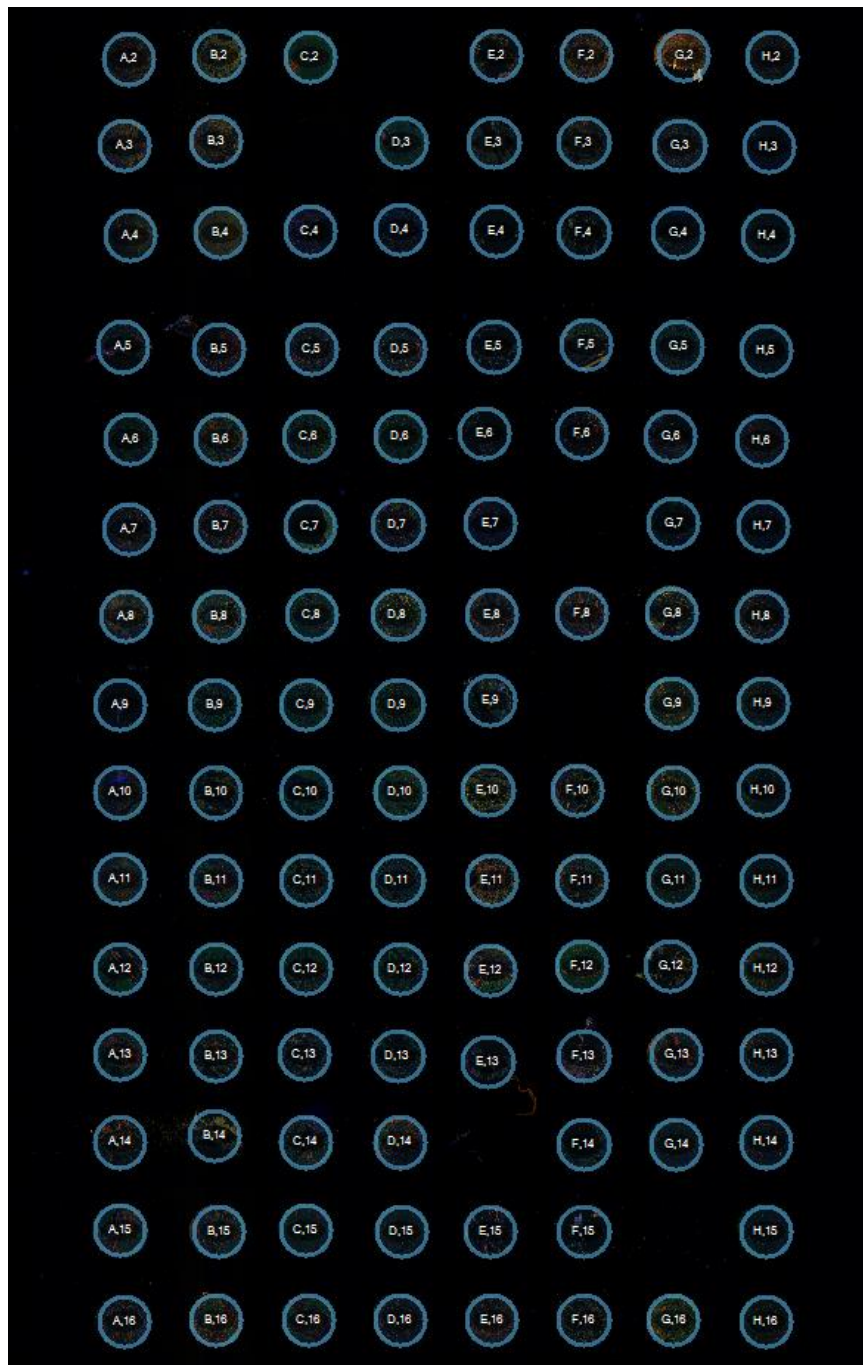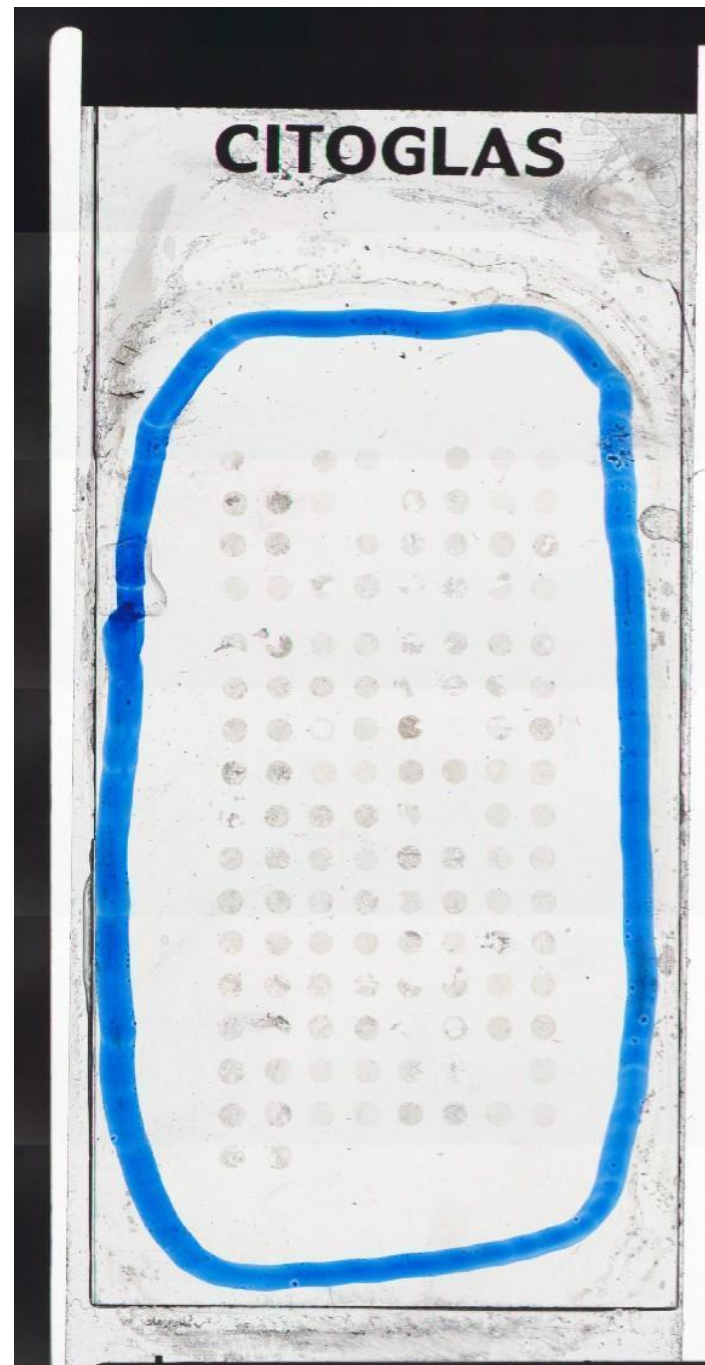



# Panel 1

## TMA 08

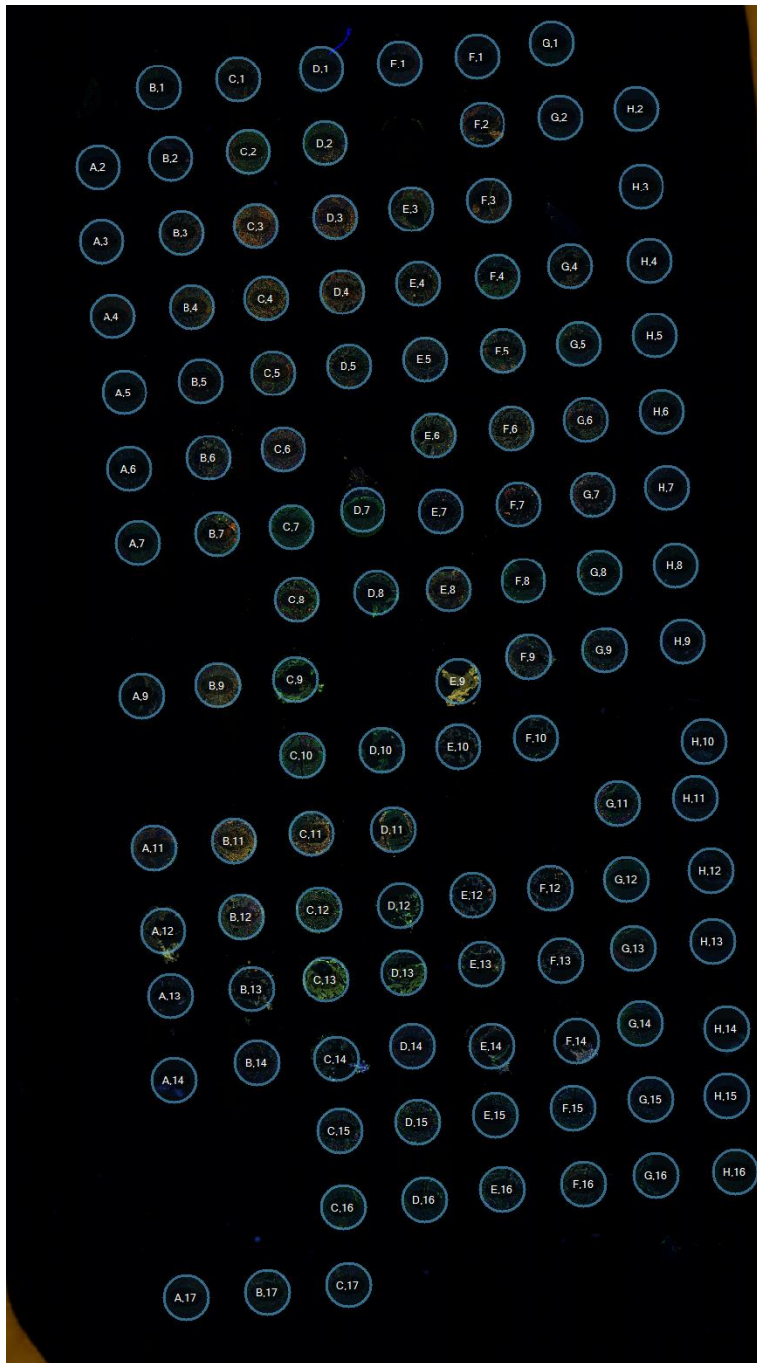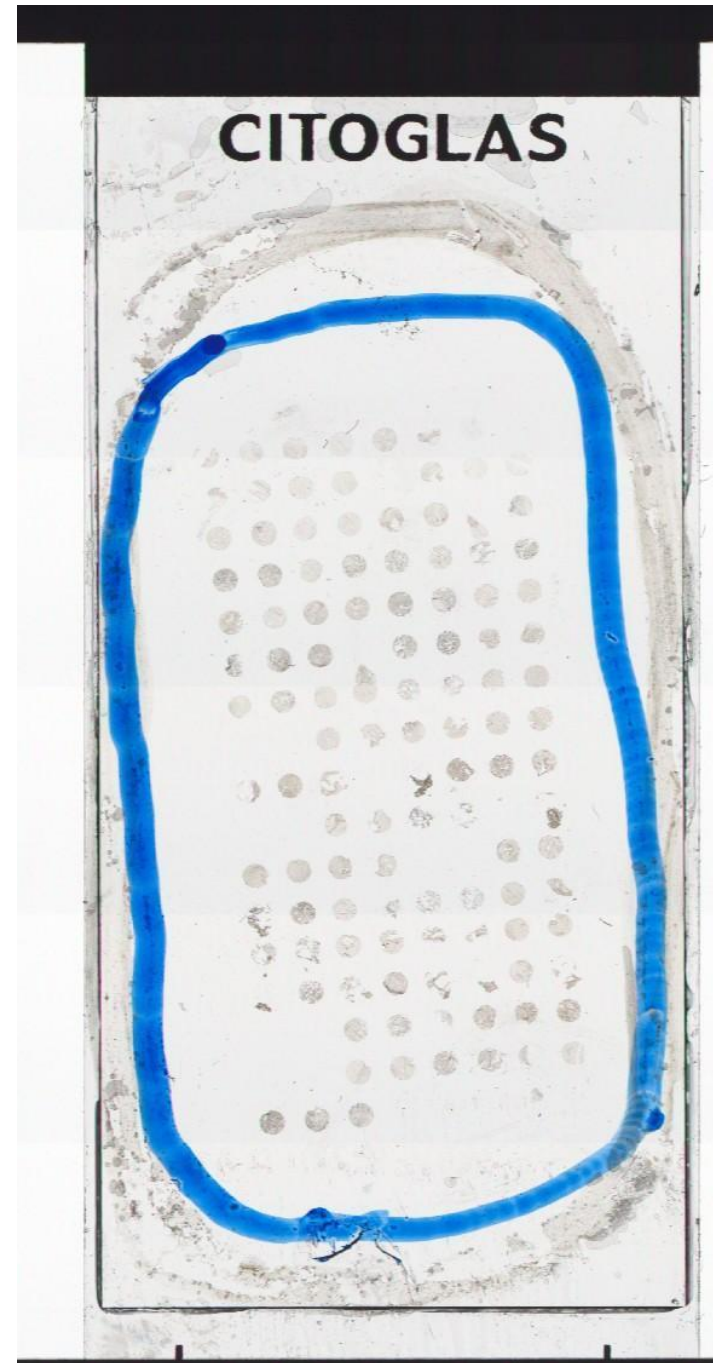

# Panel 1

## TMA 09

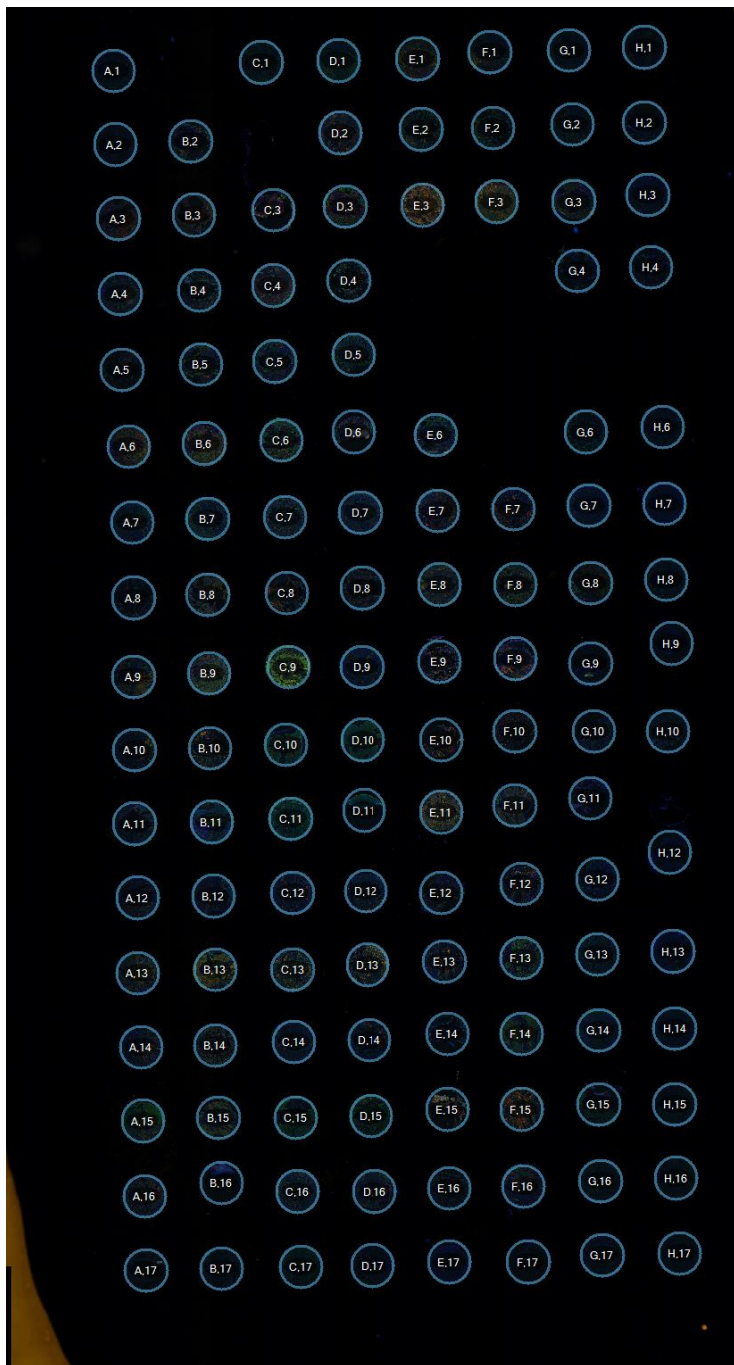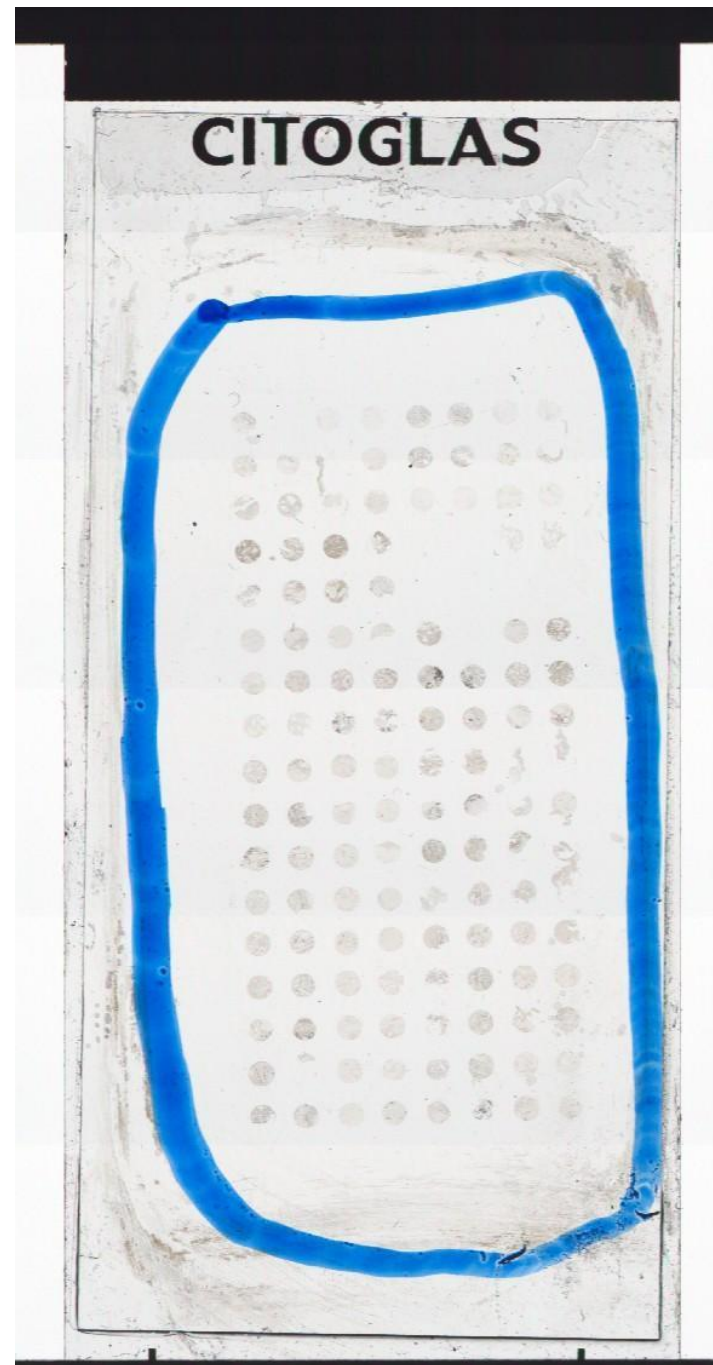

# Panel 1

## TMA 10

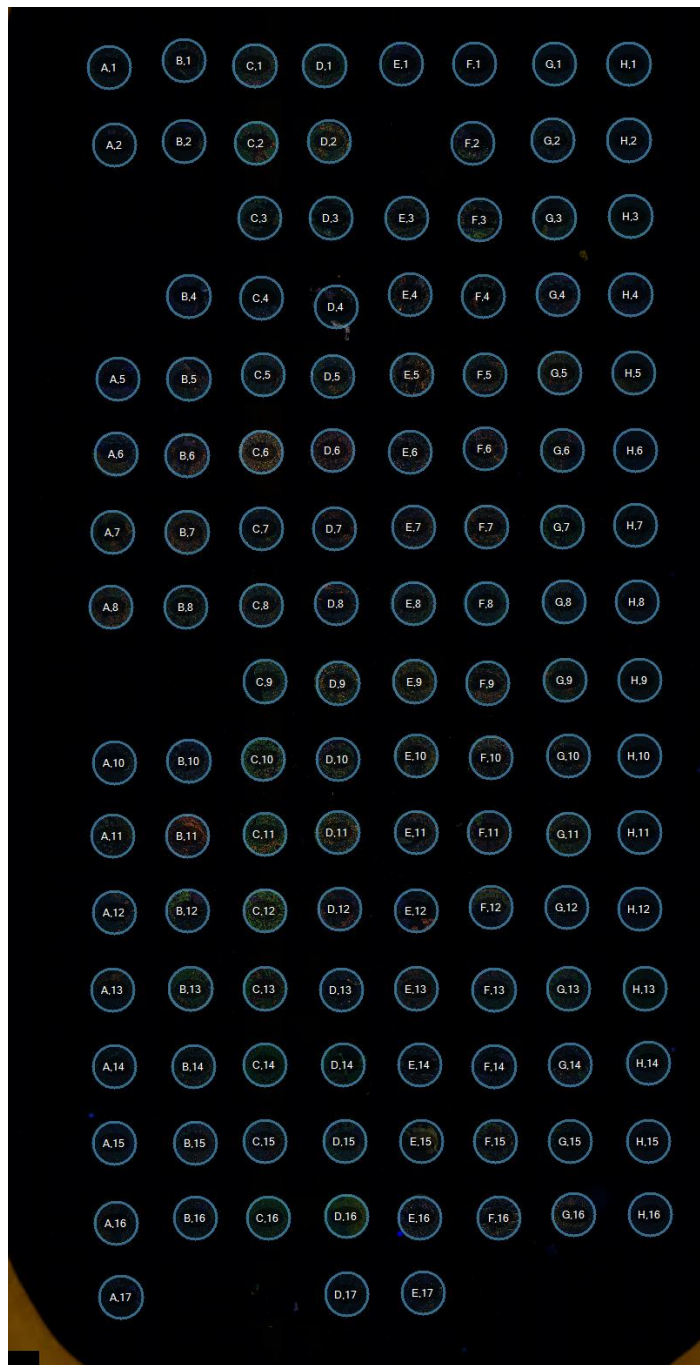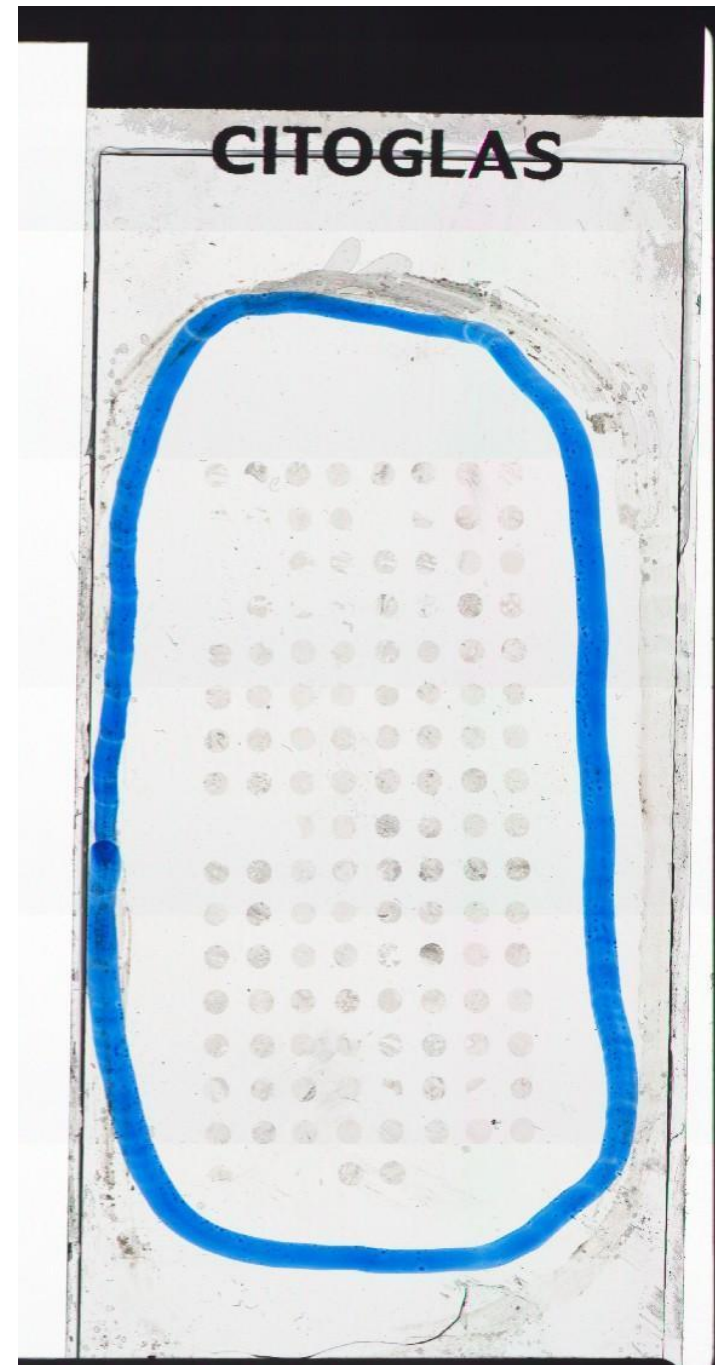

# Panel 1

TMA 11

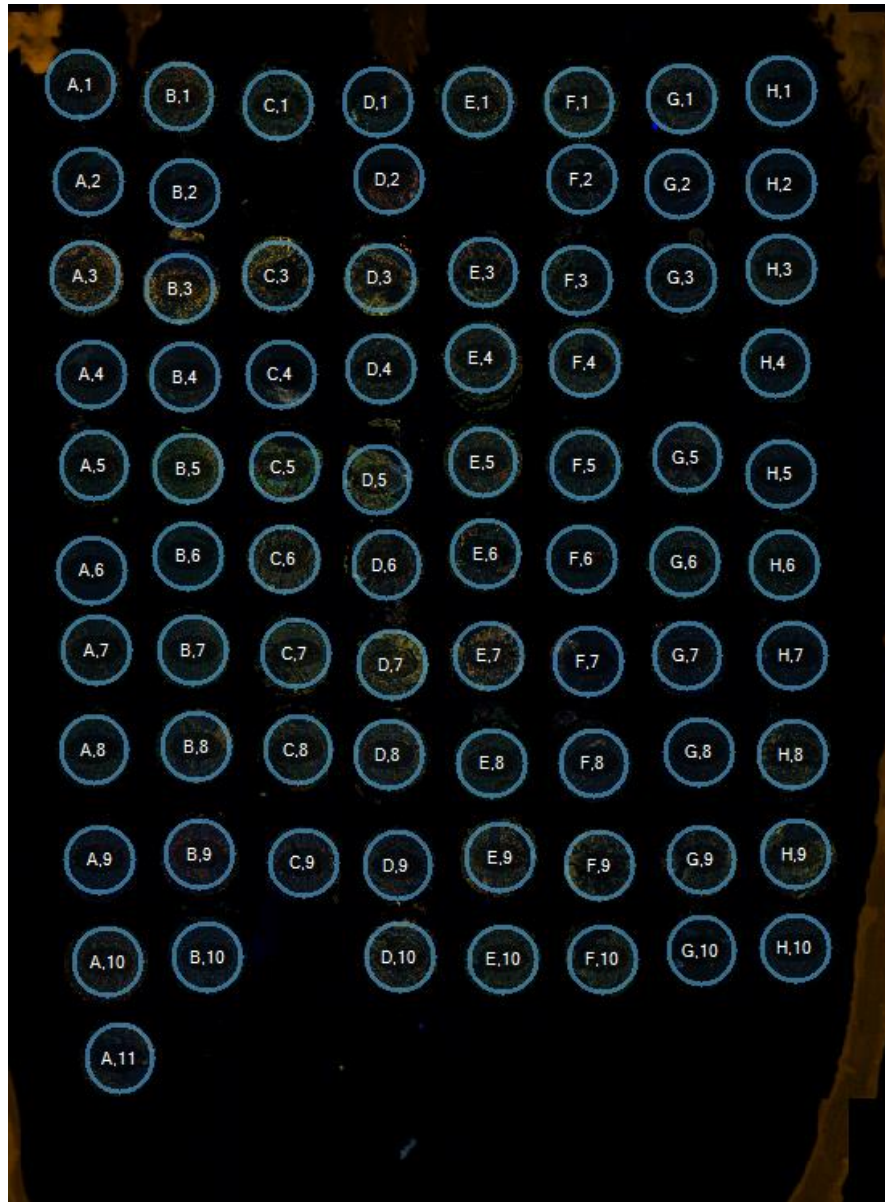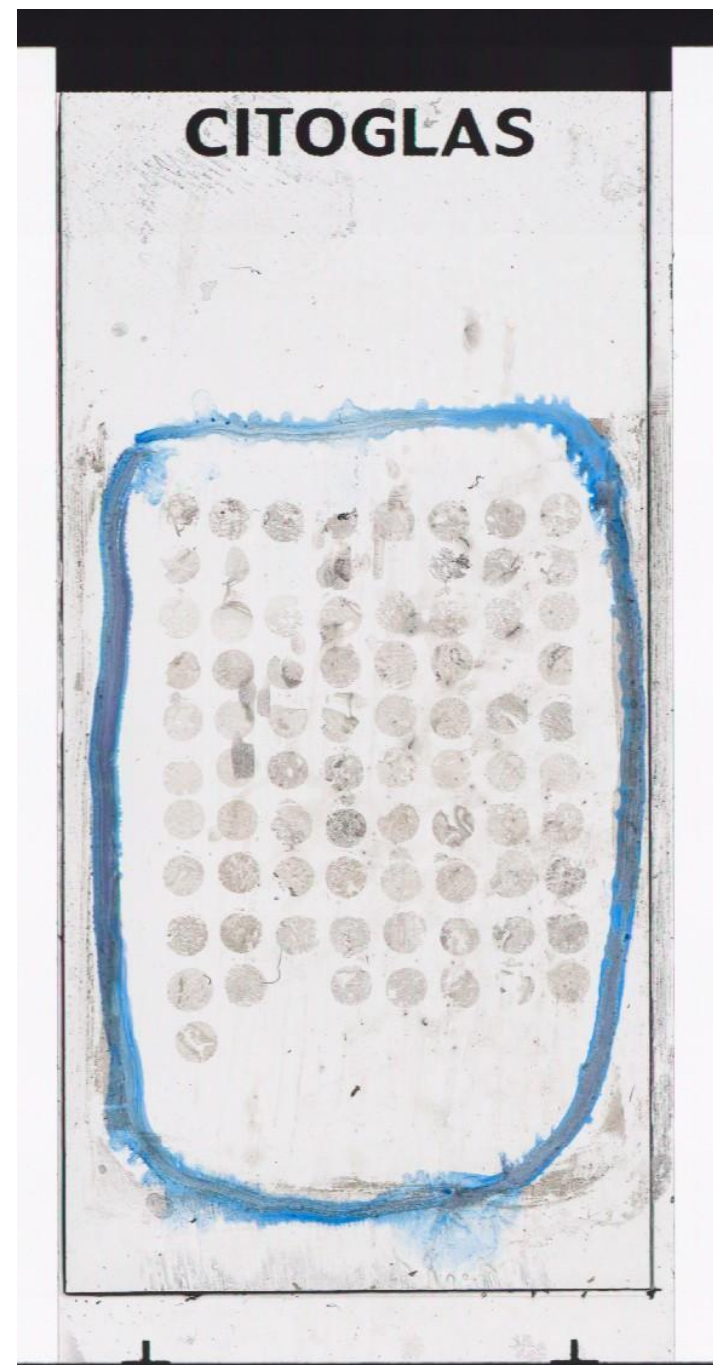

# Panel 1

TMA 12

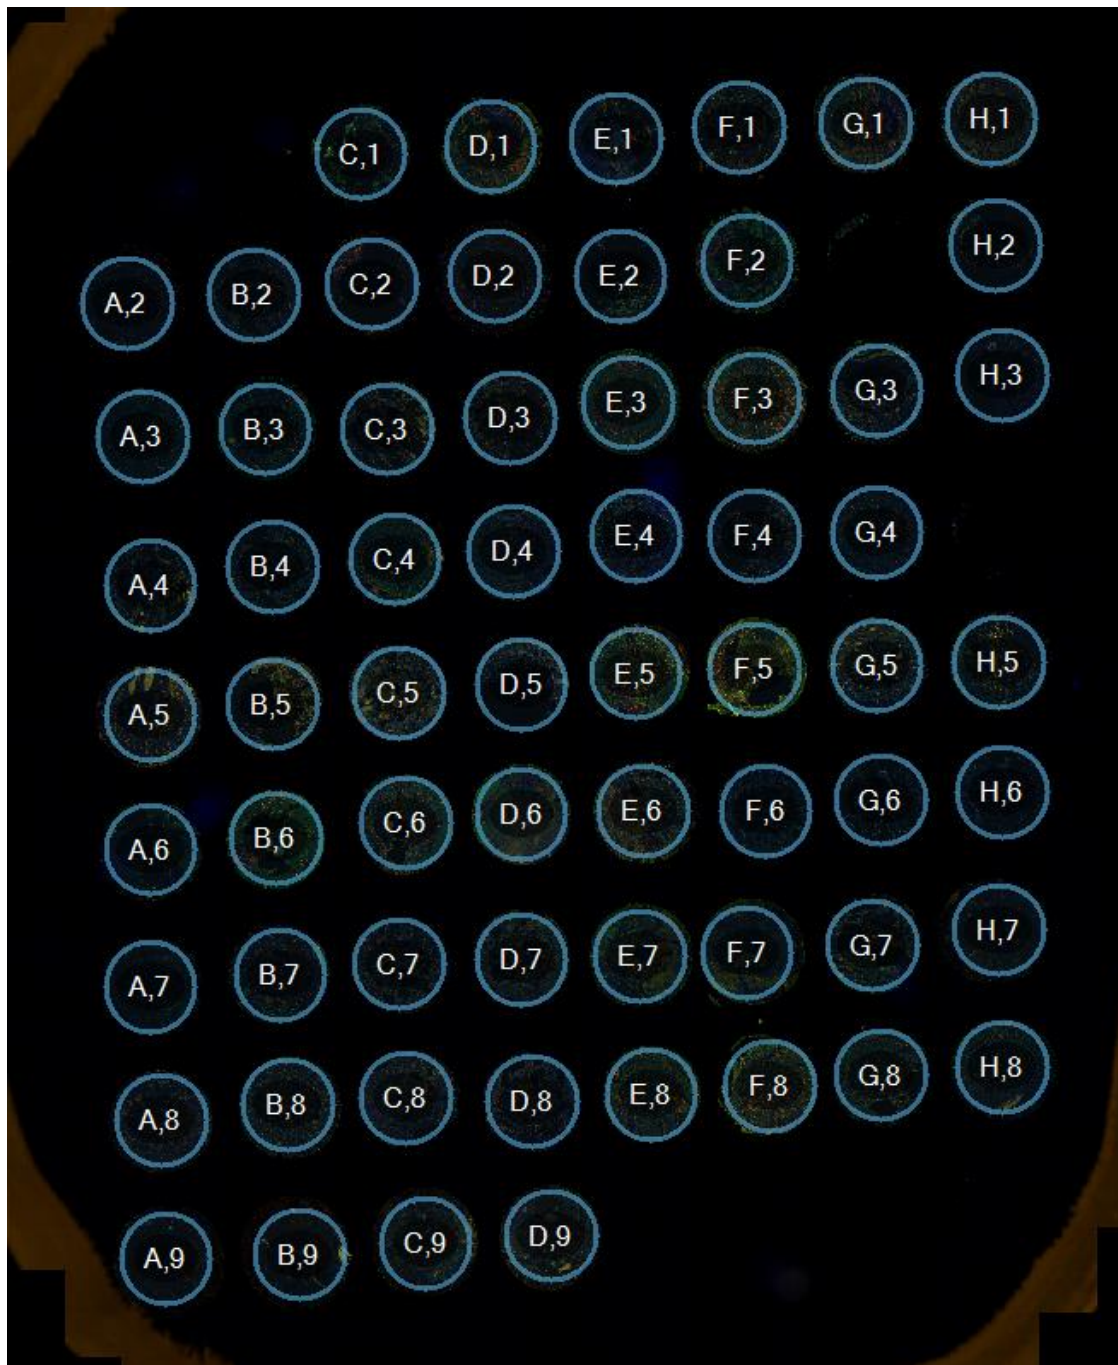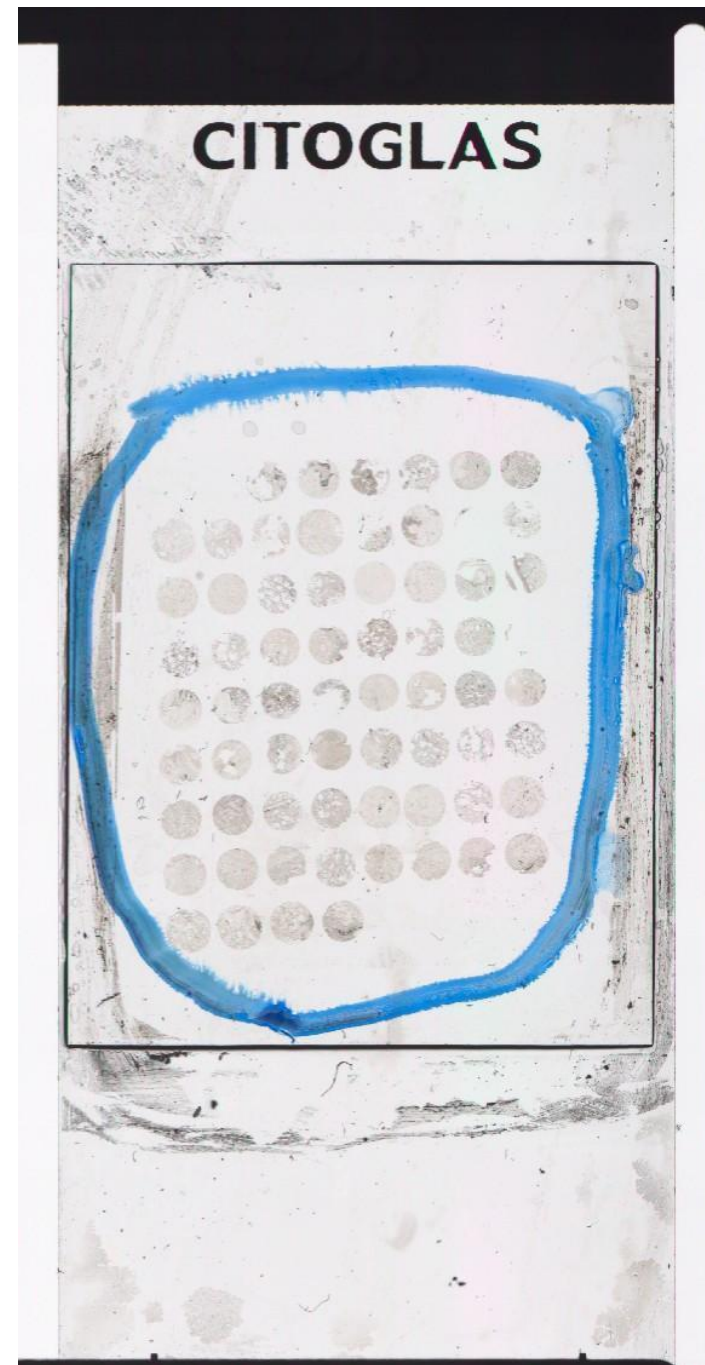

# Panel 2

## TMA 13

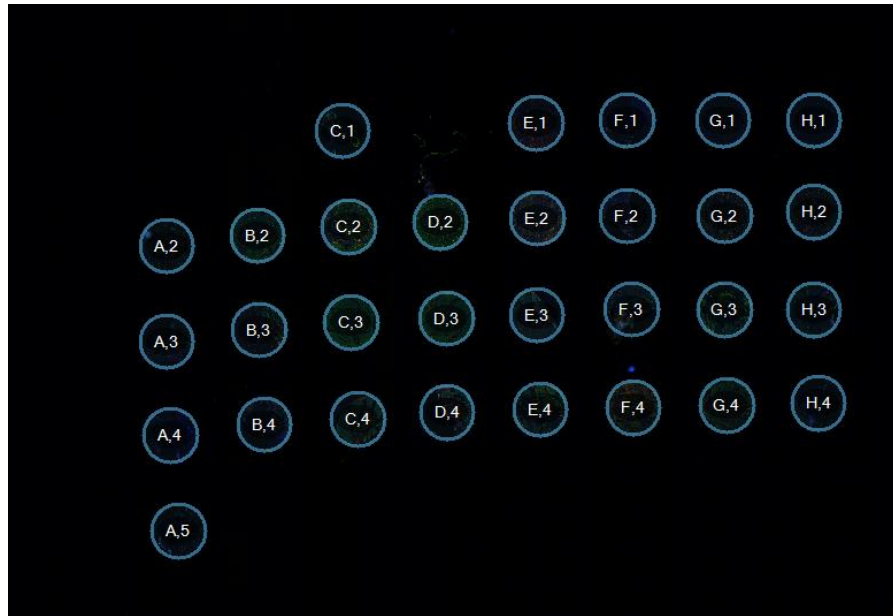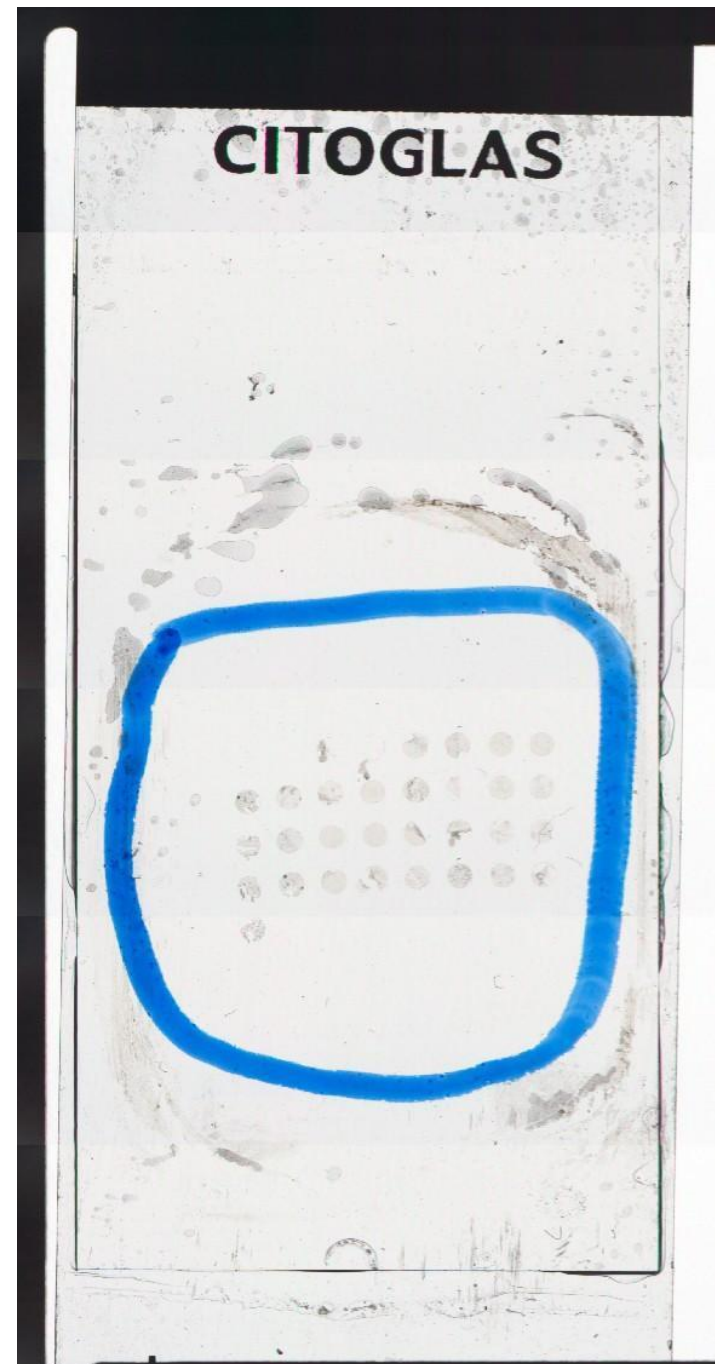

# Panel 2

TMA 01

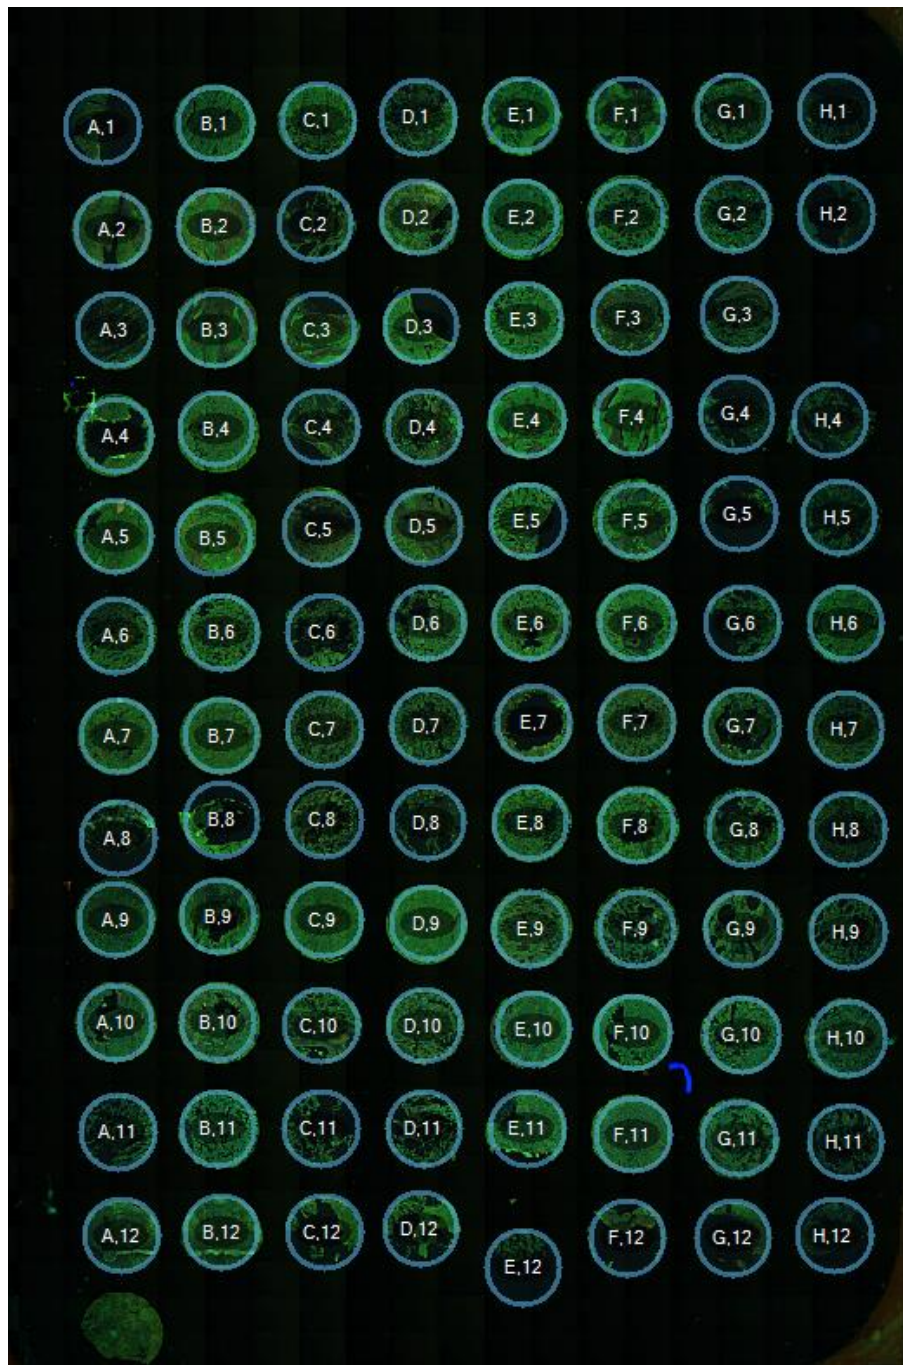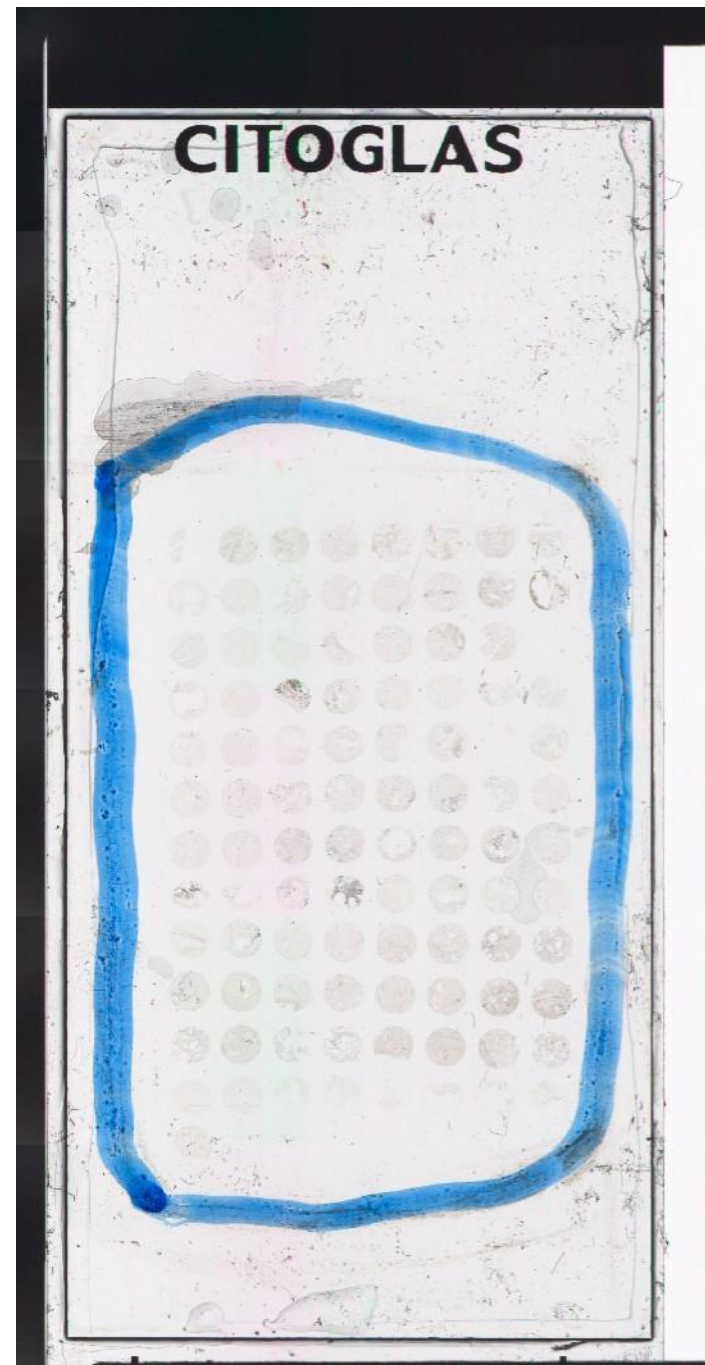

# Panel 2

TMA 02

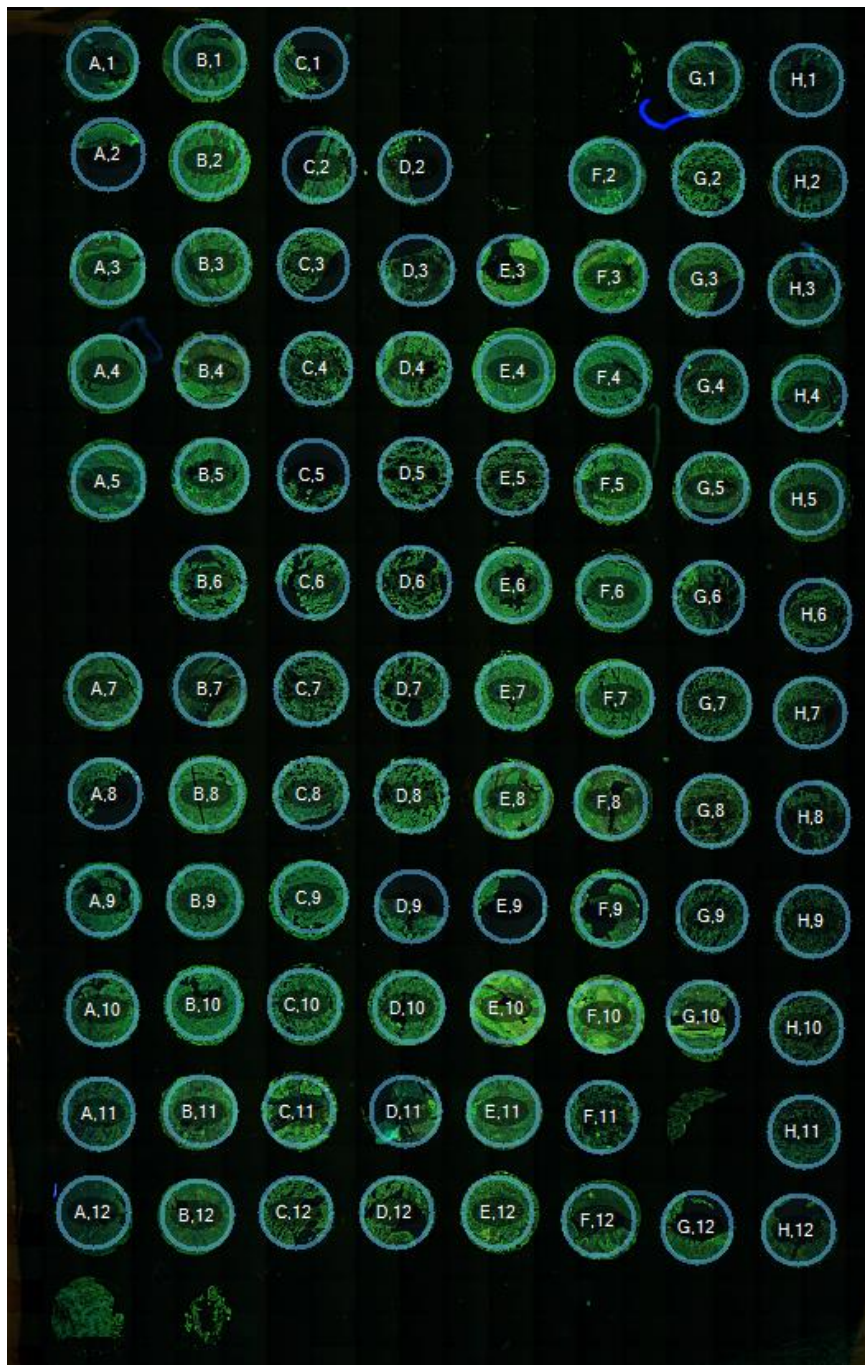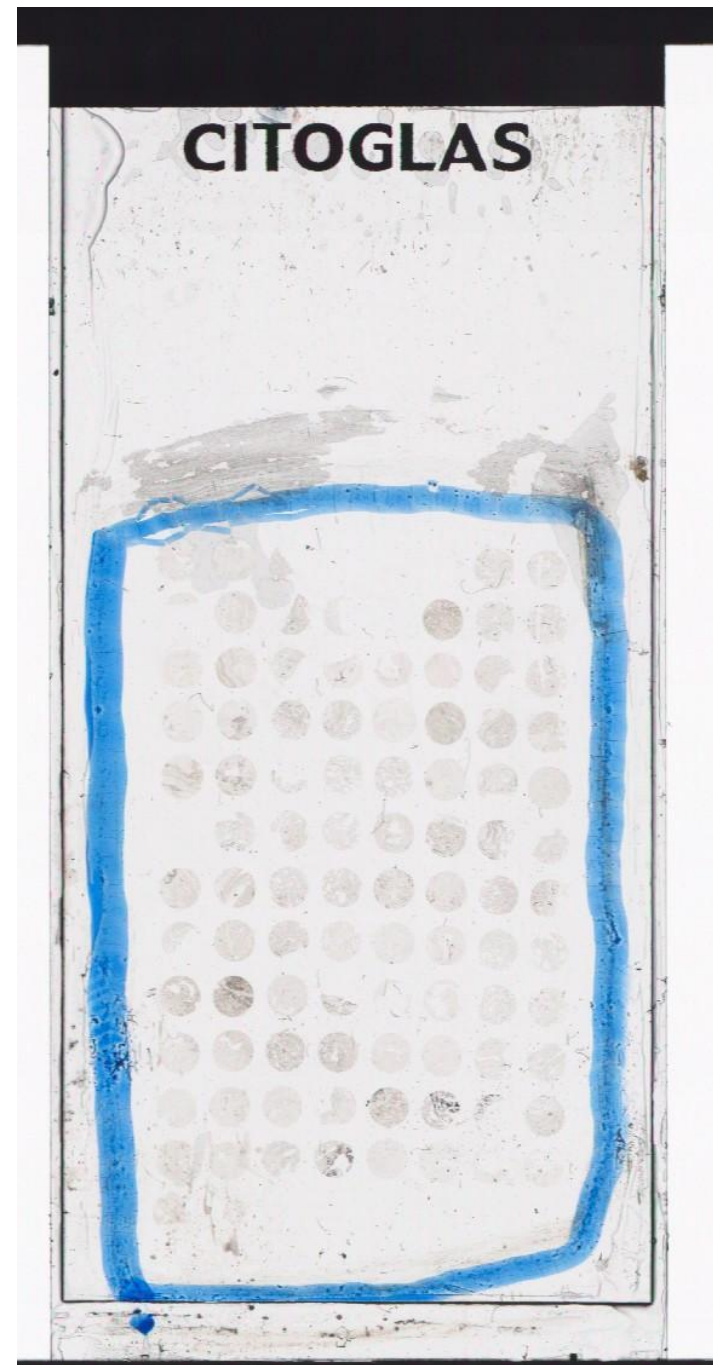



# Panel 2

## TMA 03

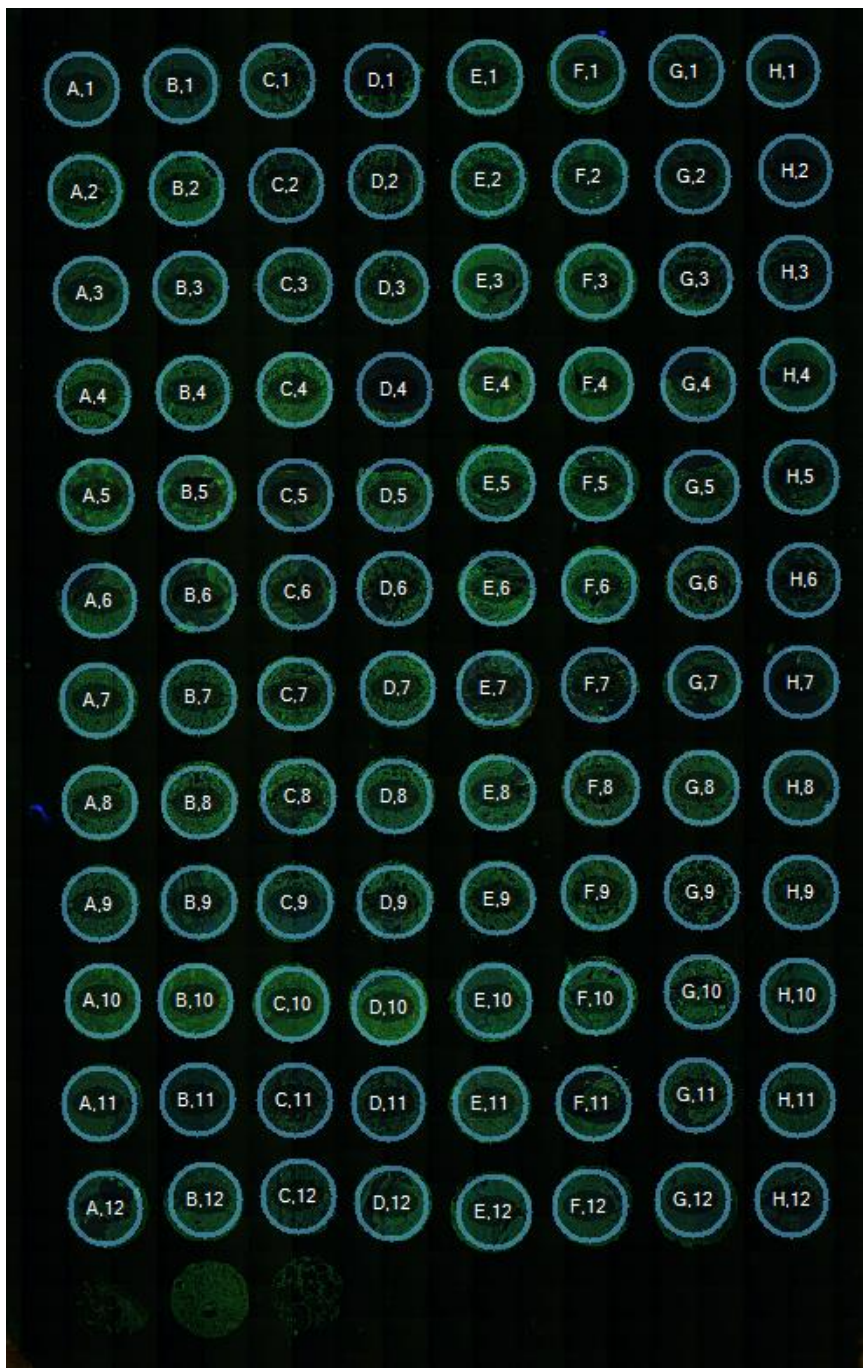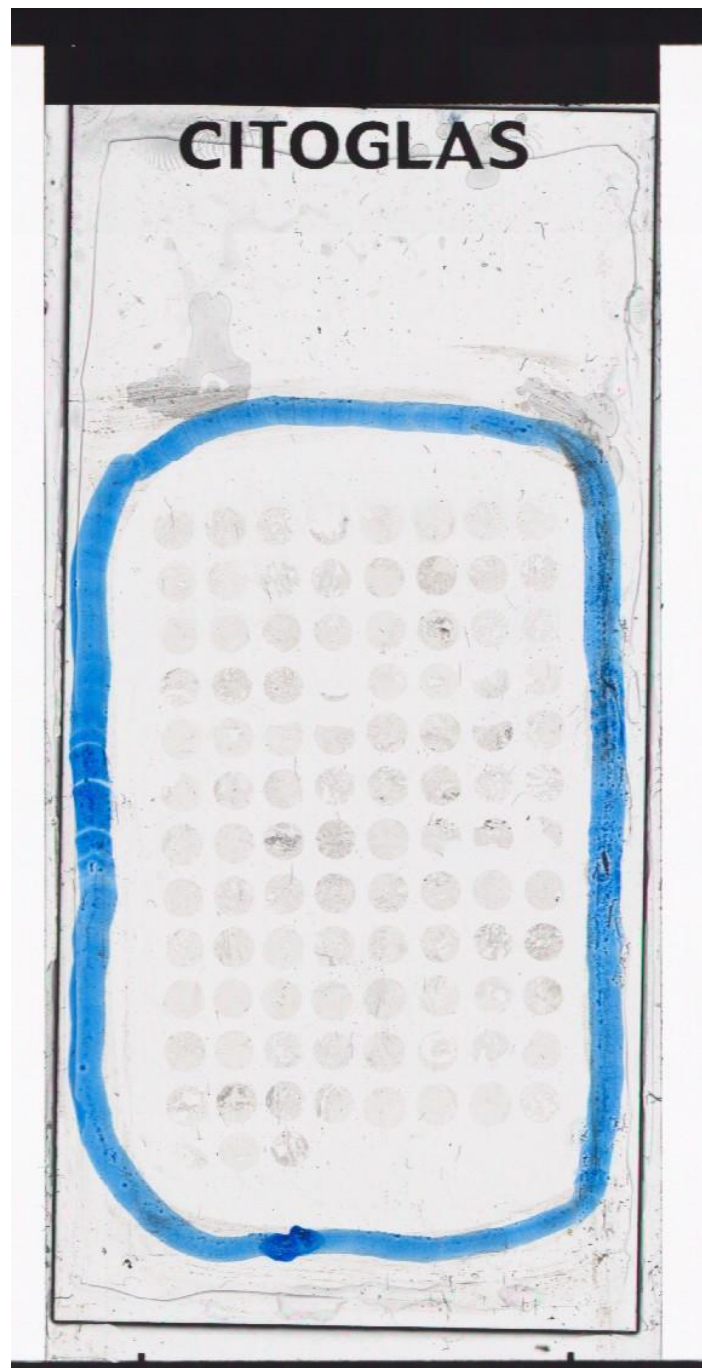

**Panel 2**  
**TMA 04**

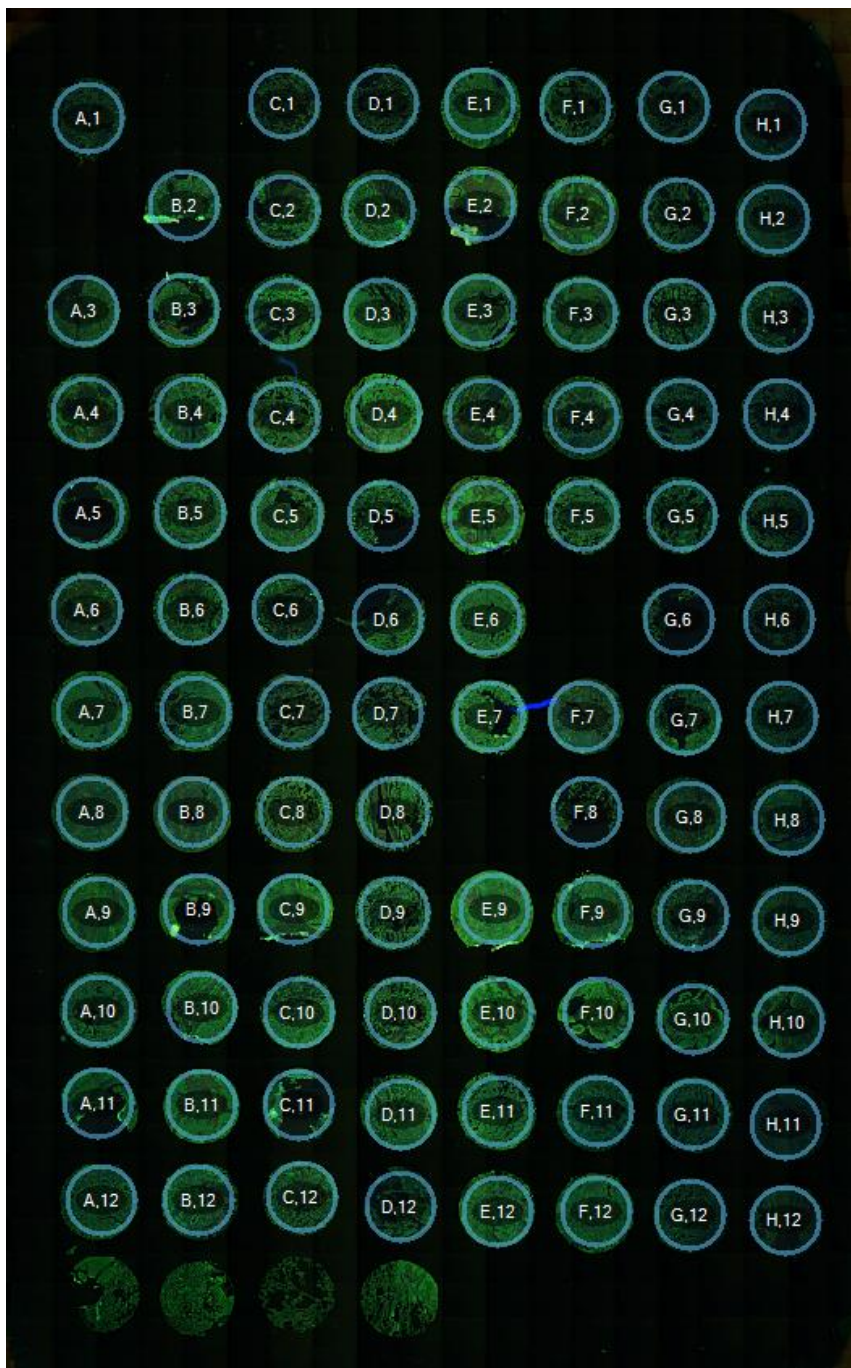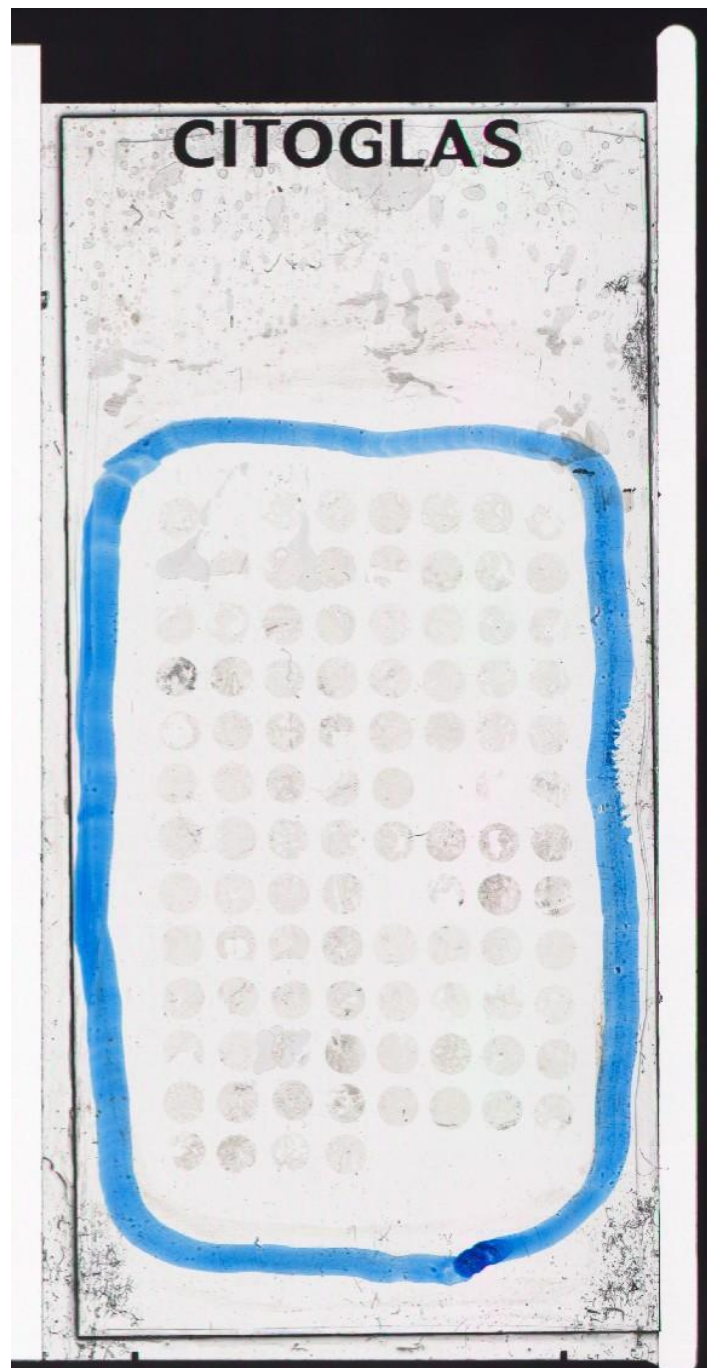

**Panel 2**  
**TMA 05**

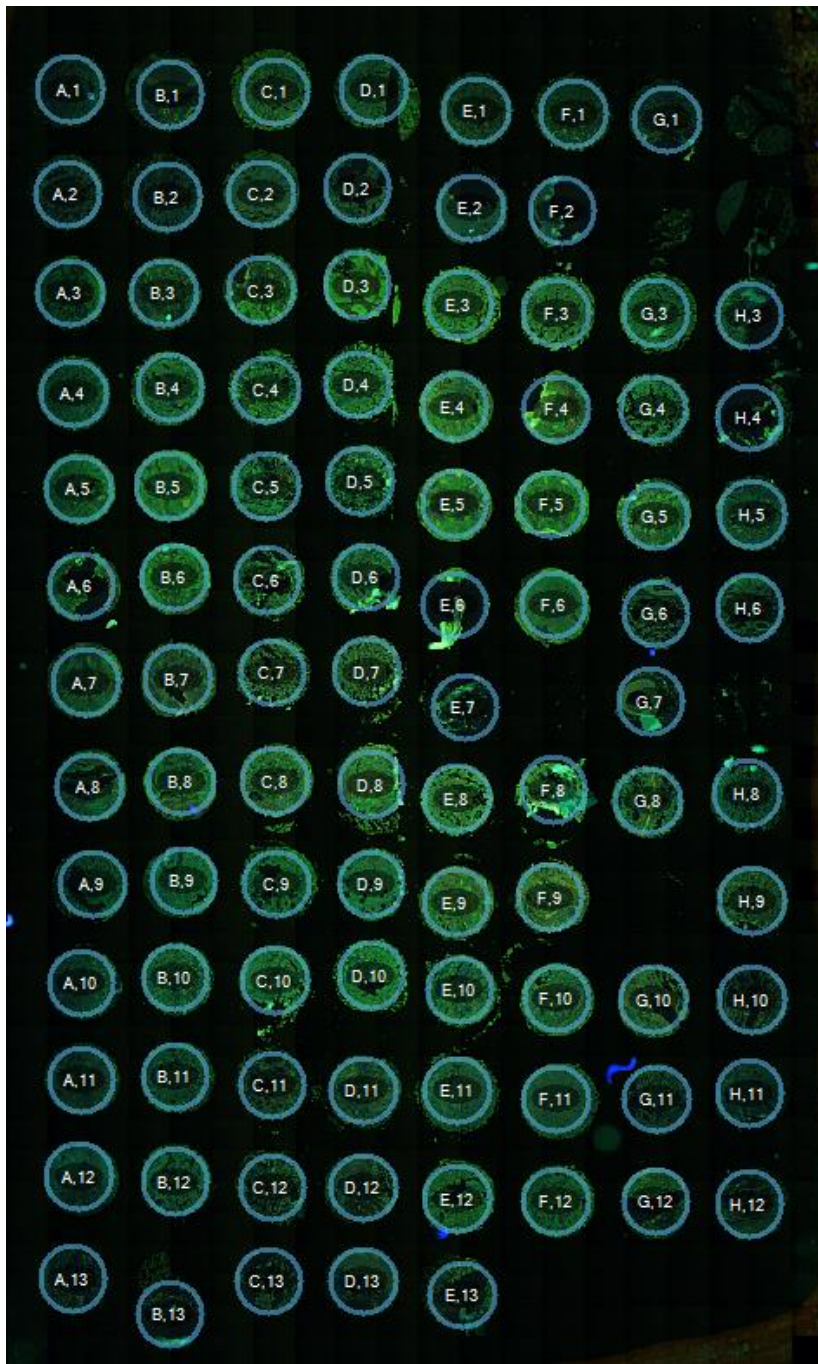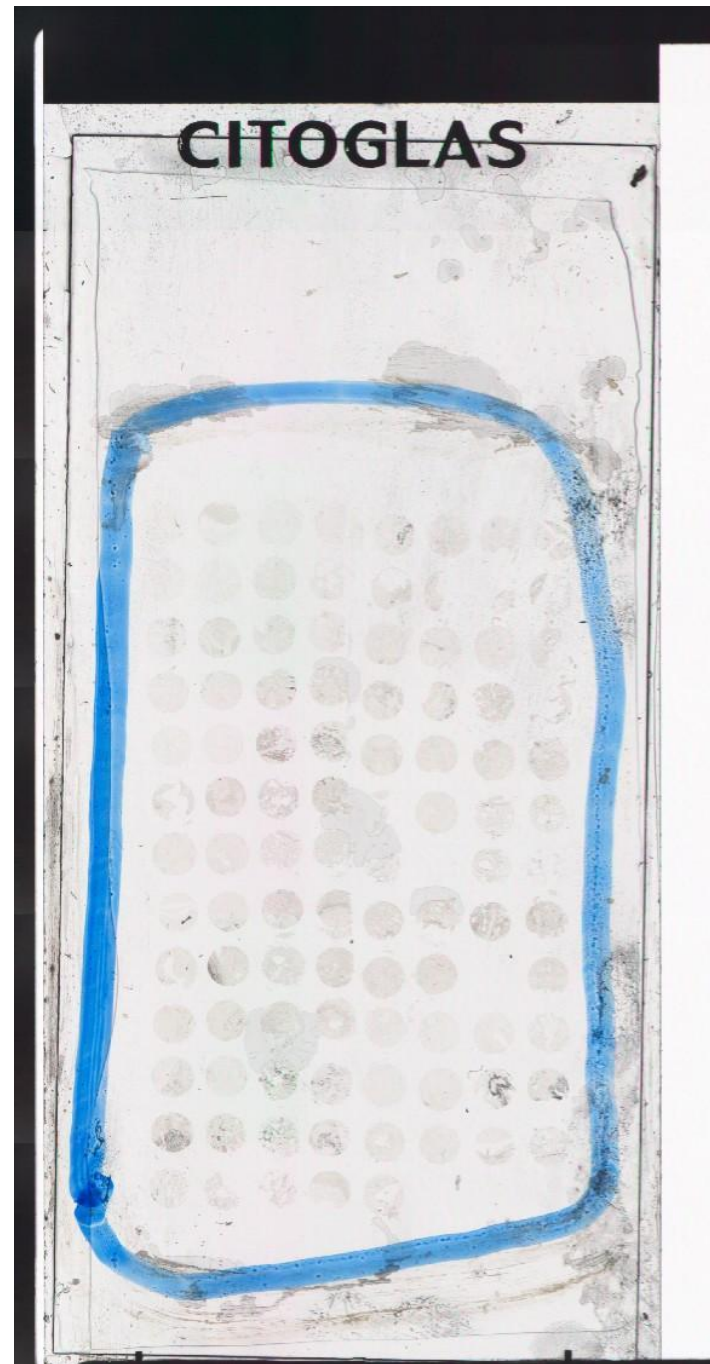

# Panel 2

TMA 06

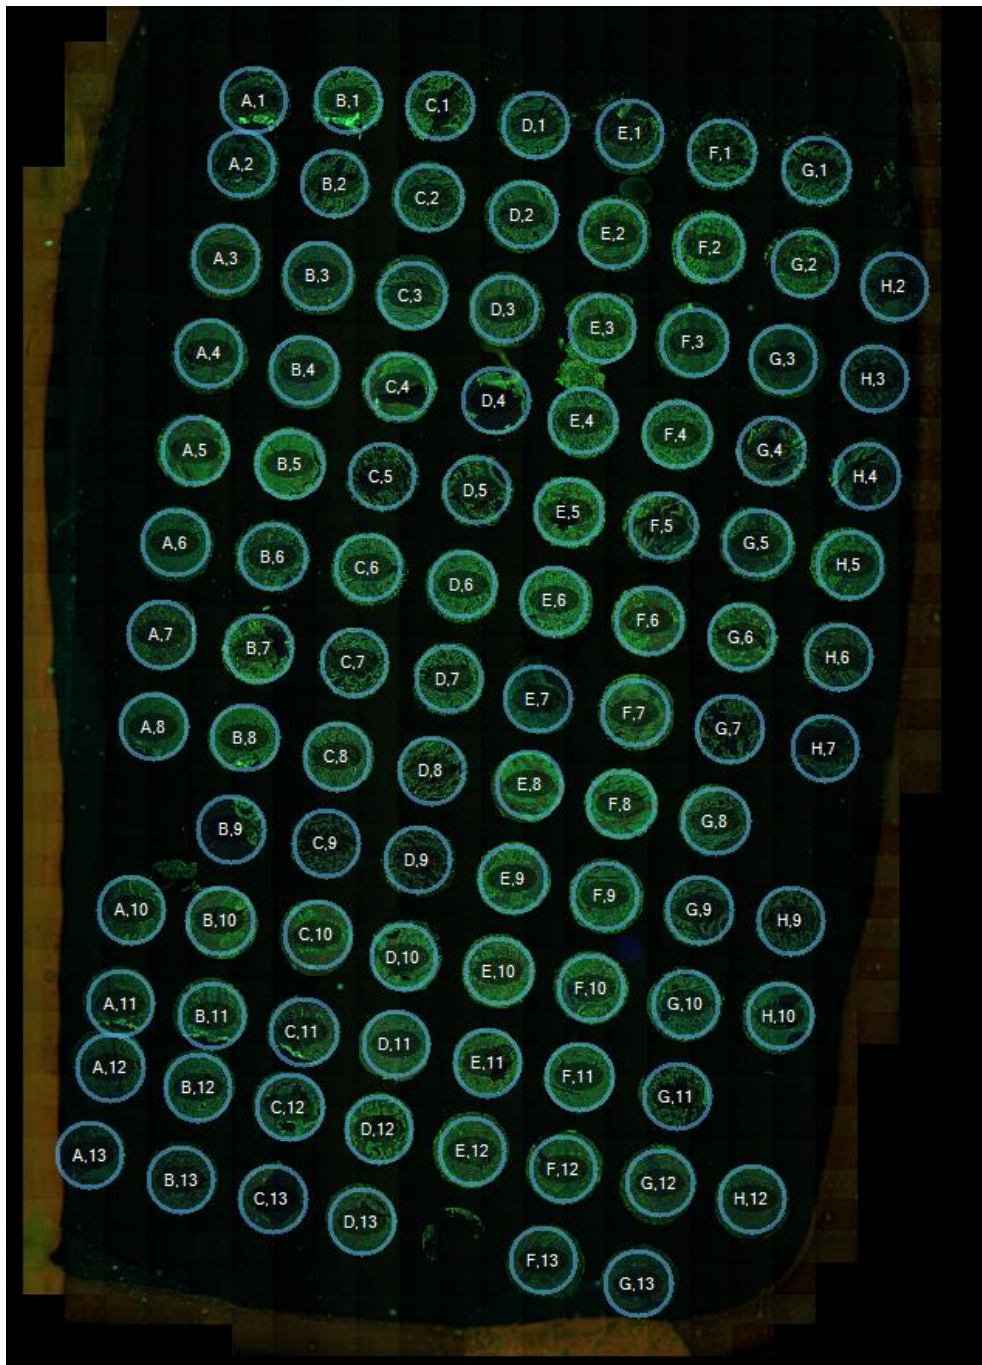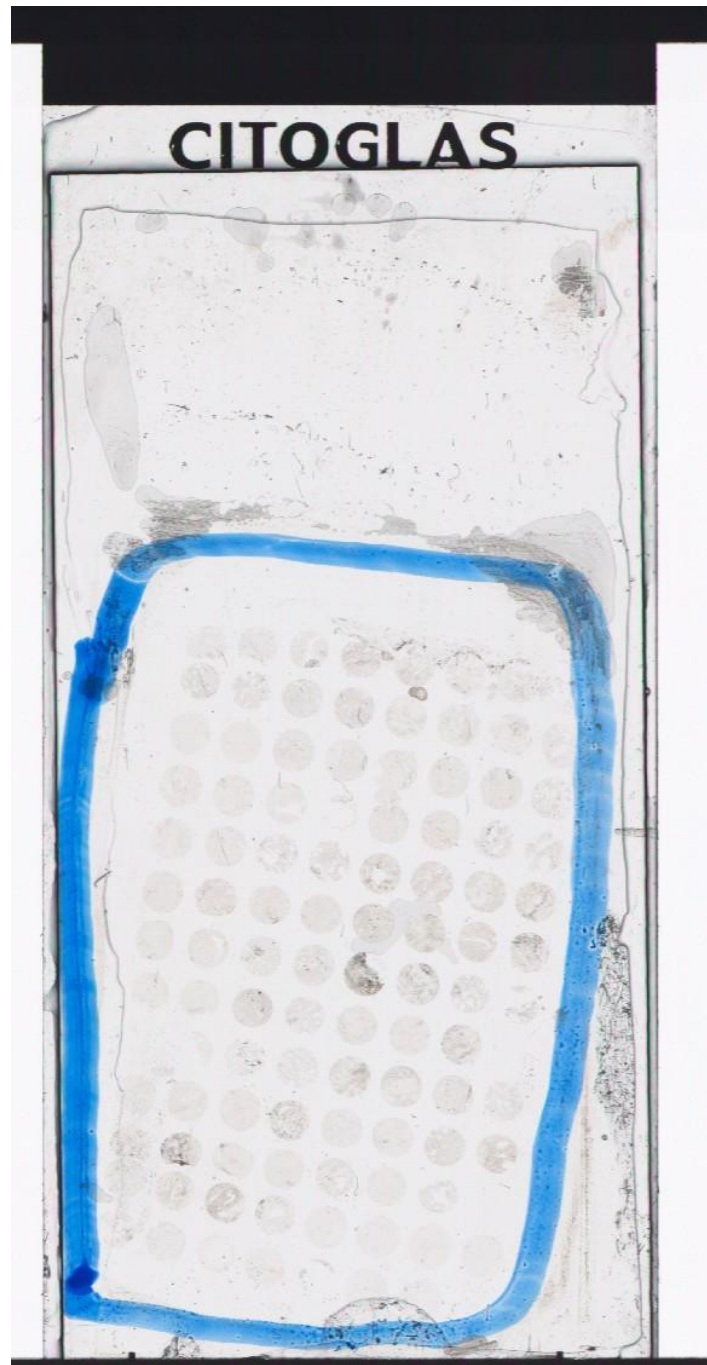

# Panel 2

TMA 07

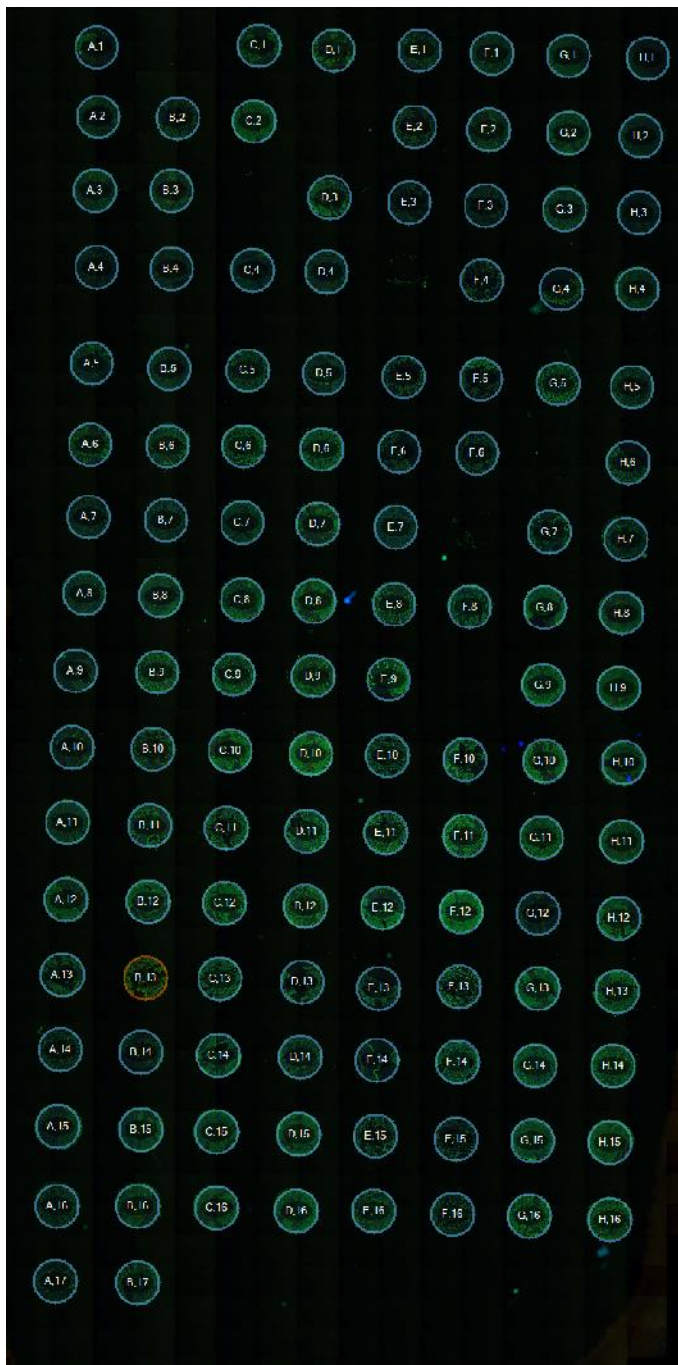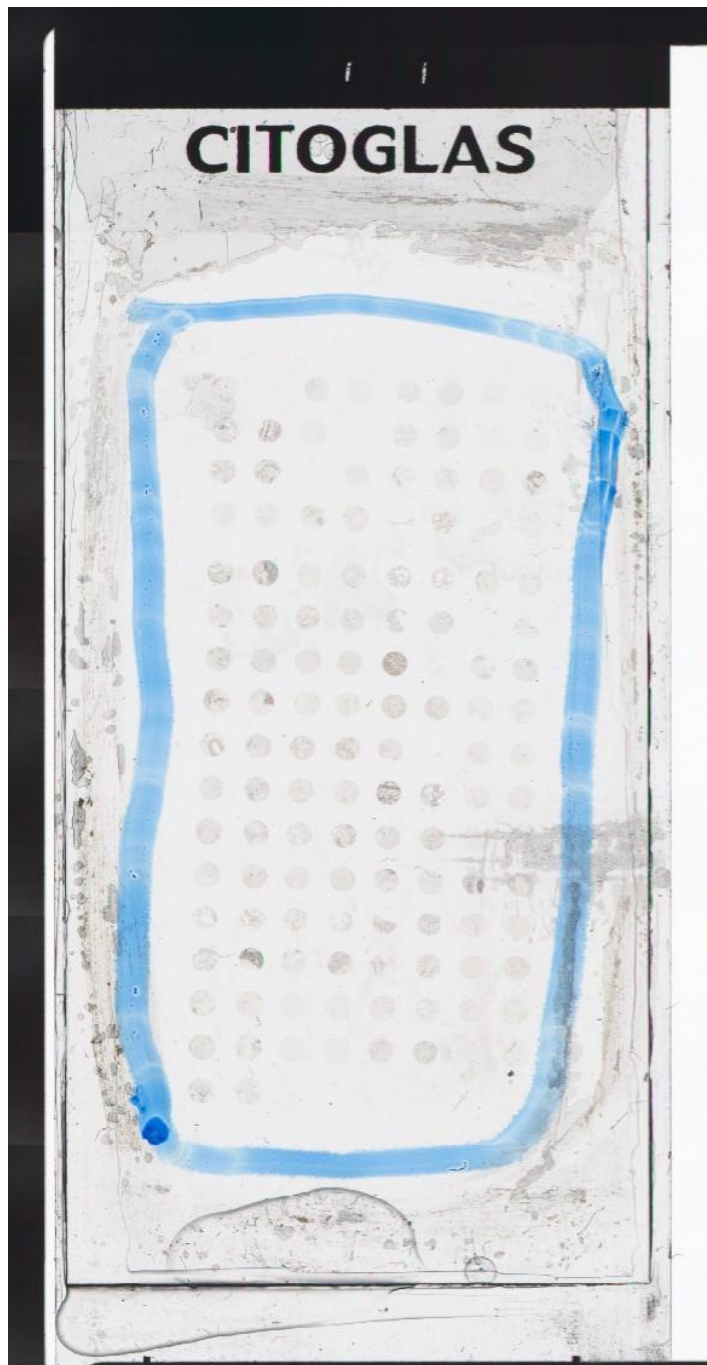

# Panel 2

## TMA 08

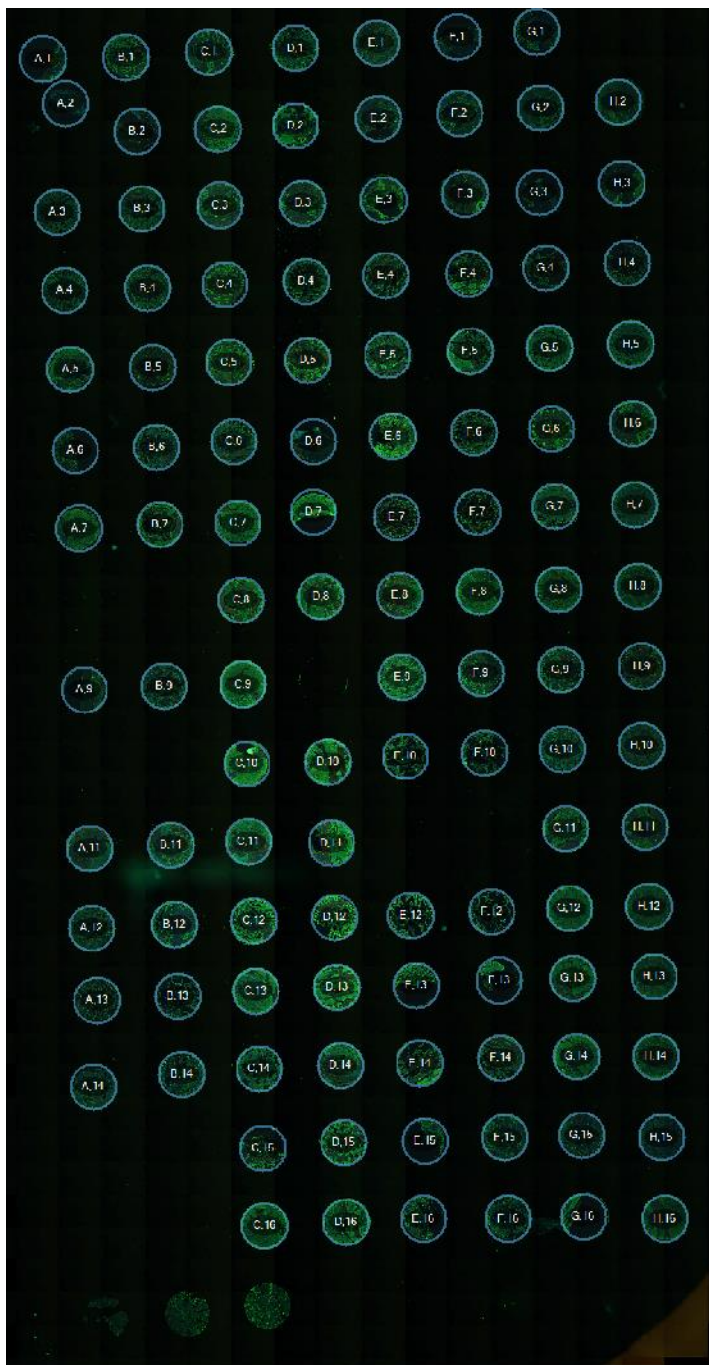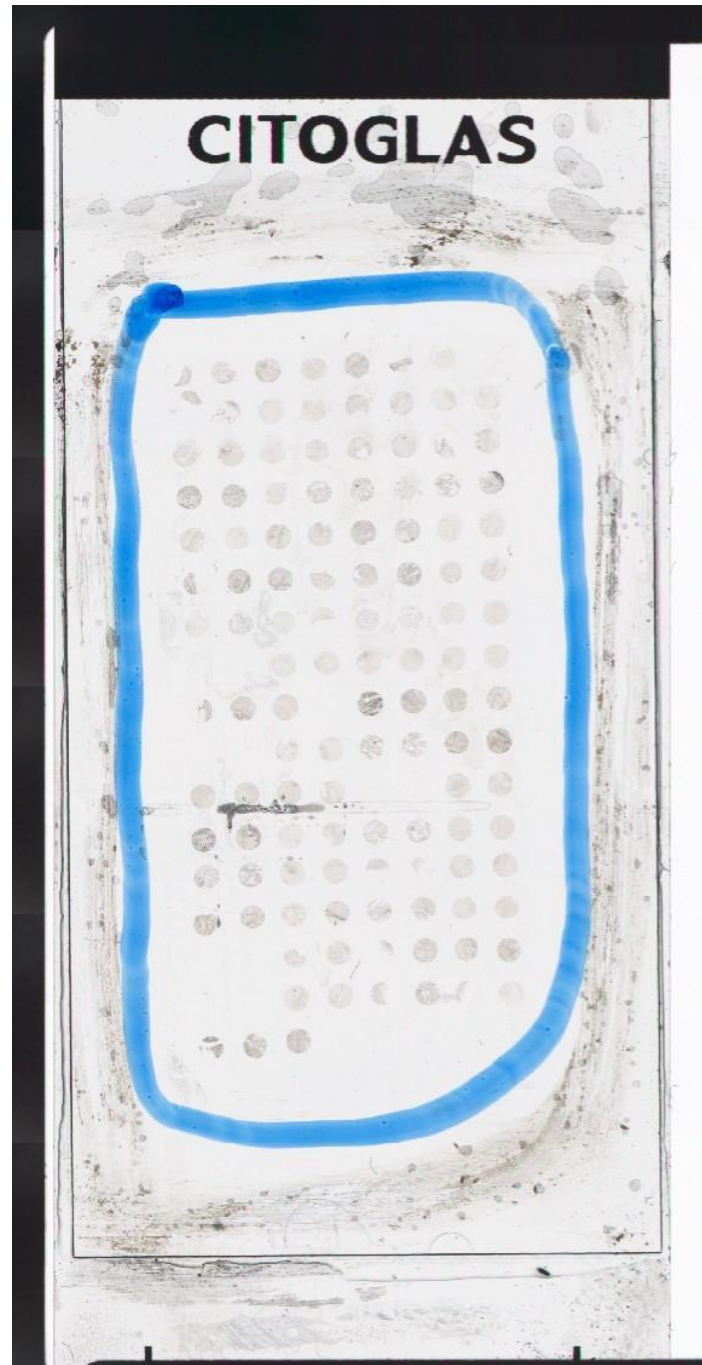

**Panel 2**  
**TMA 09**

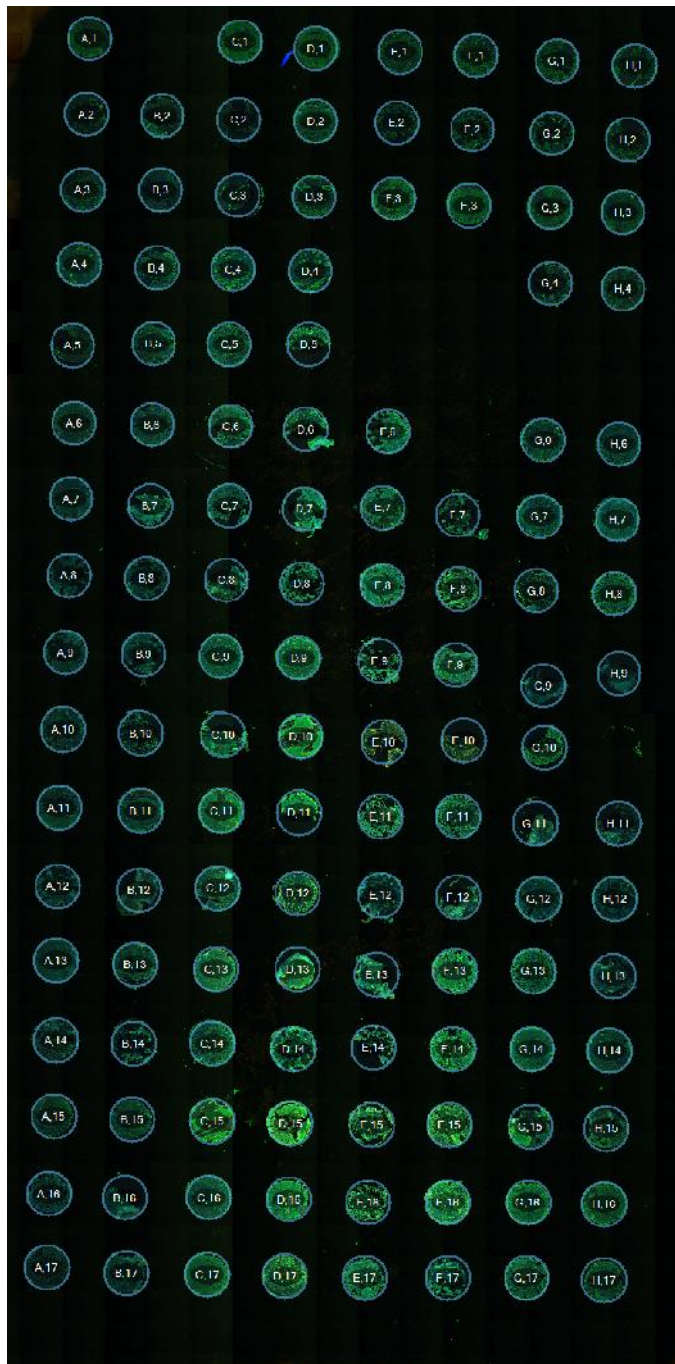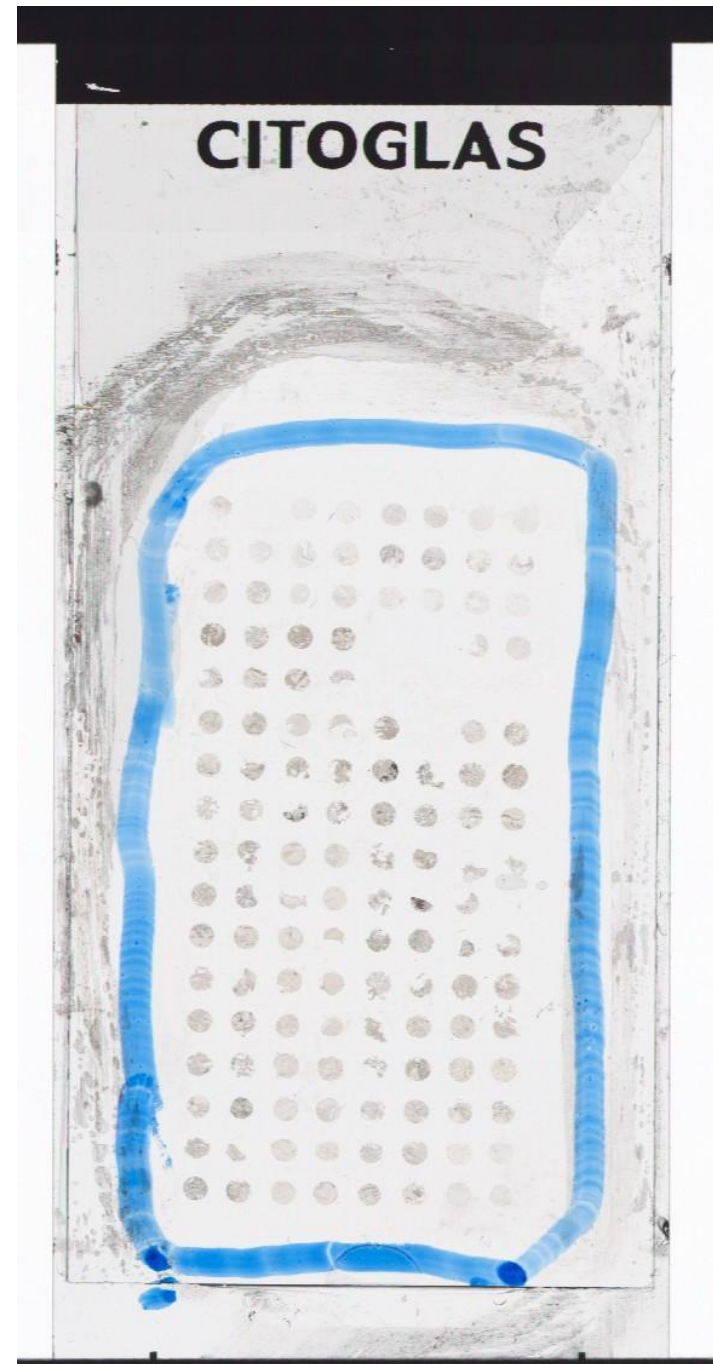

**Panel 2**  
**TMA 10**

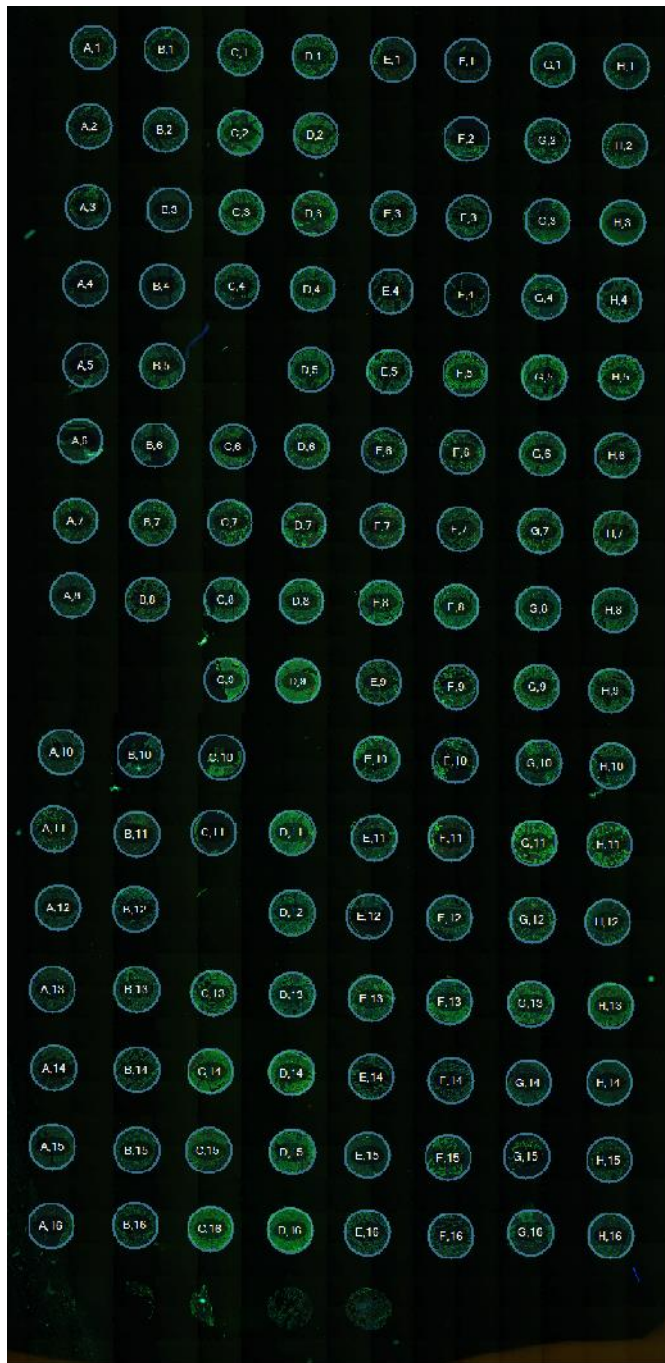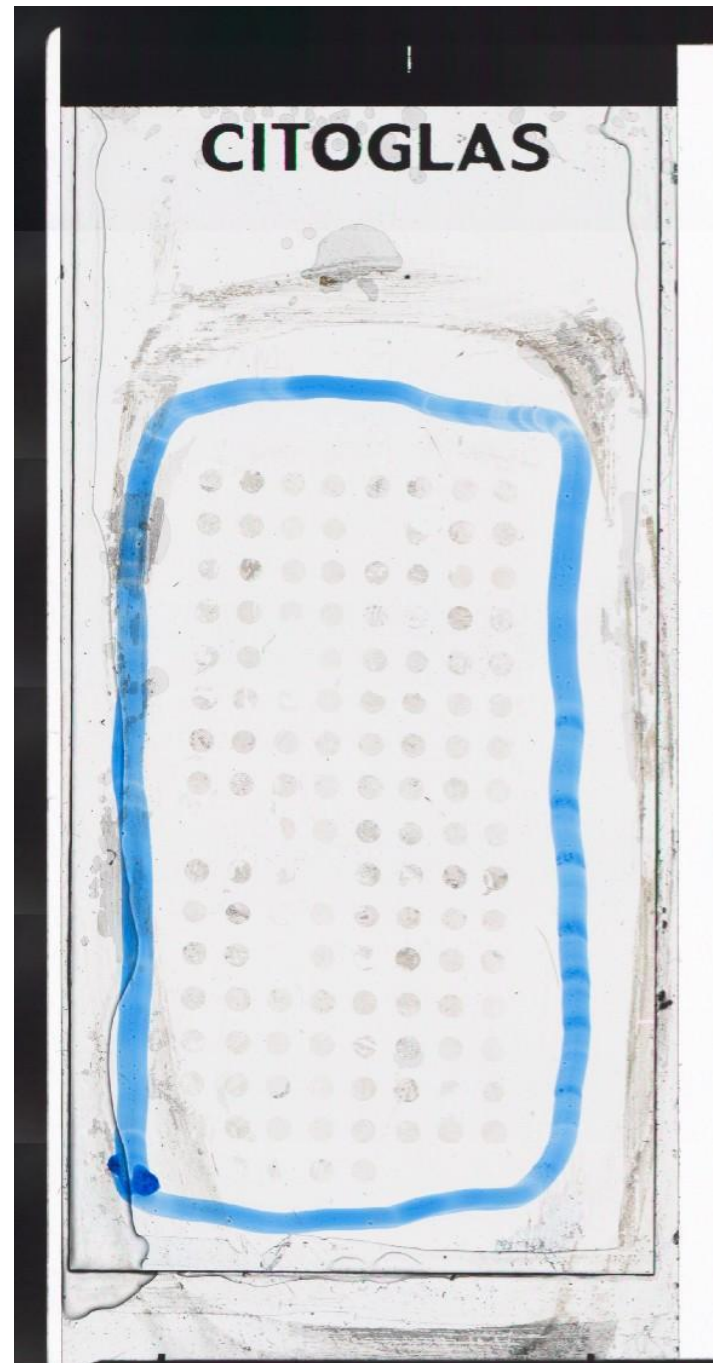



# Panel 2

## TMA 11

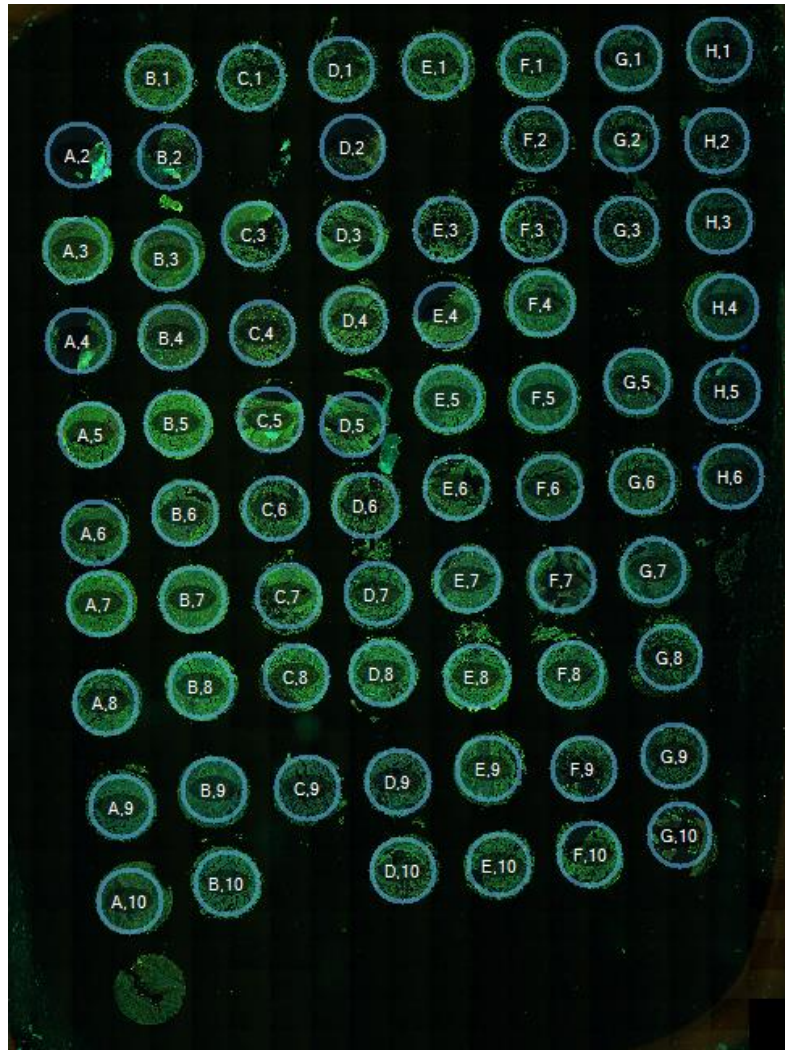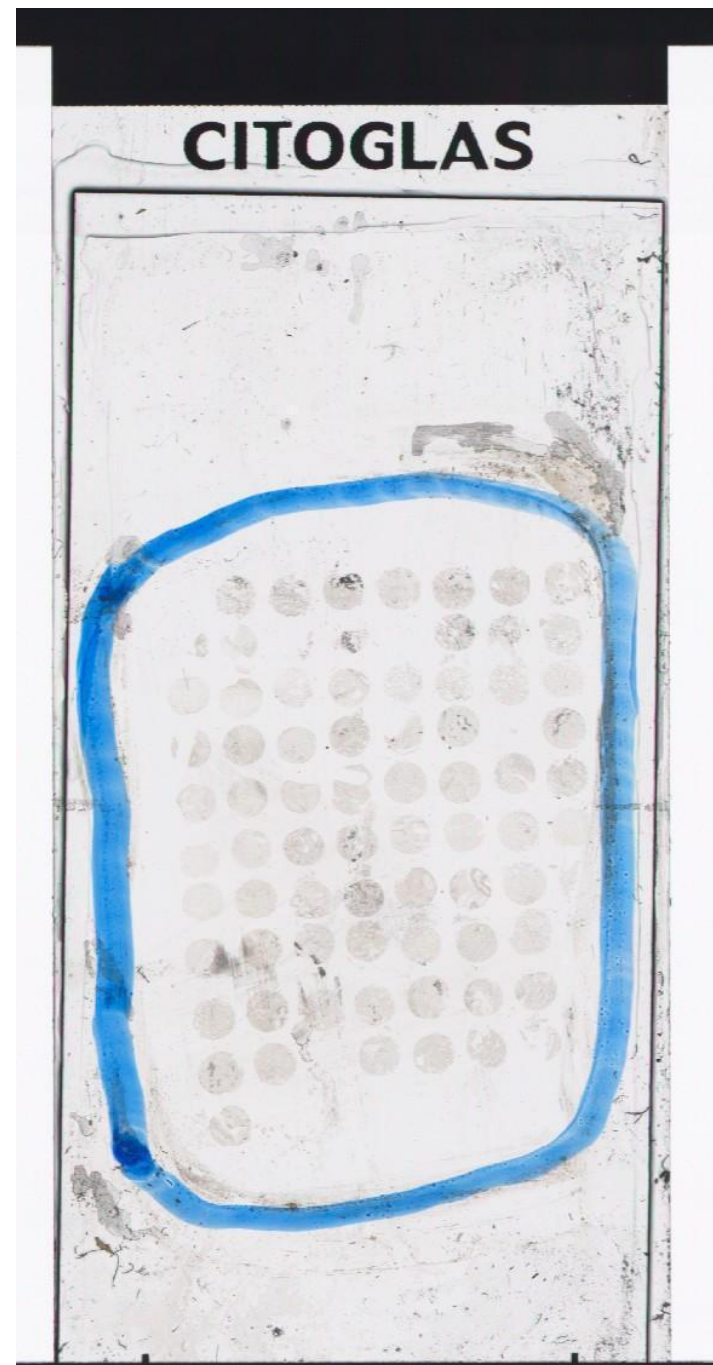

# Panel 2

## TMA 12

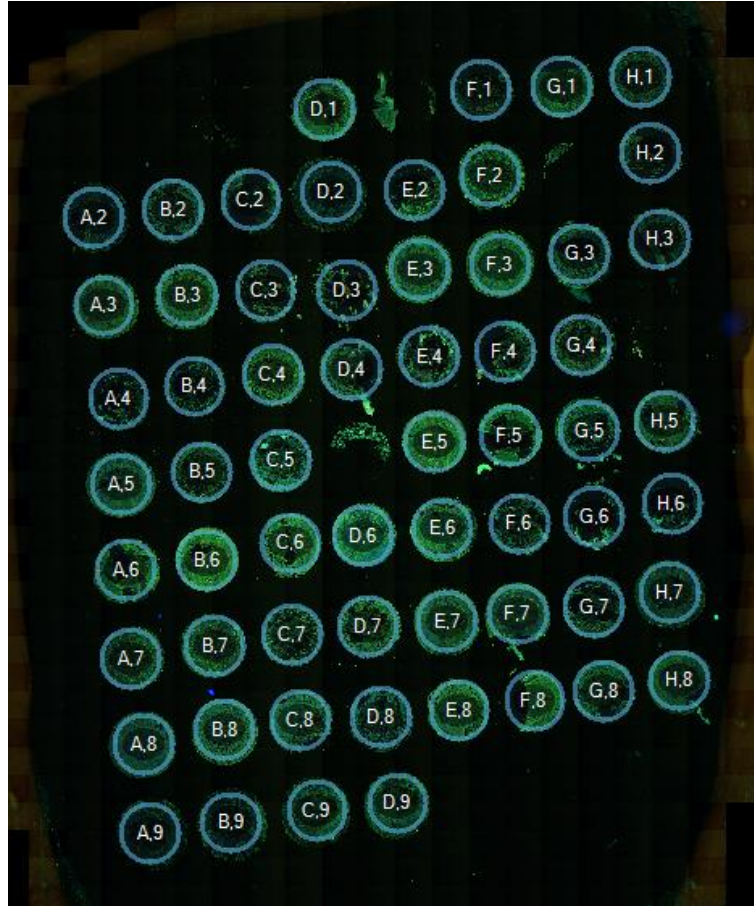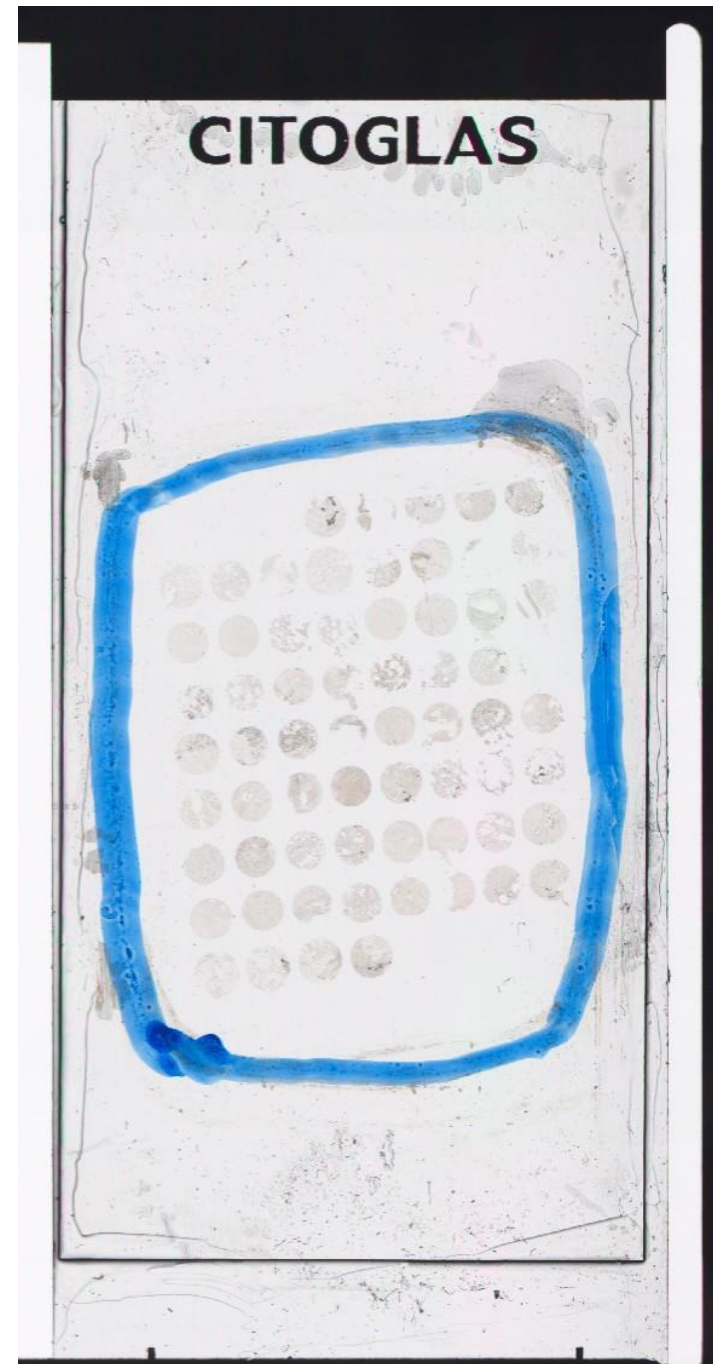

# Panel 2

## TMA 13

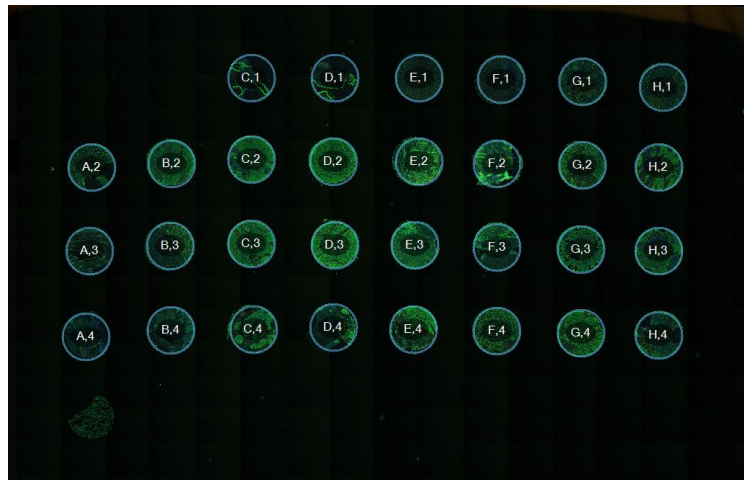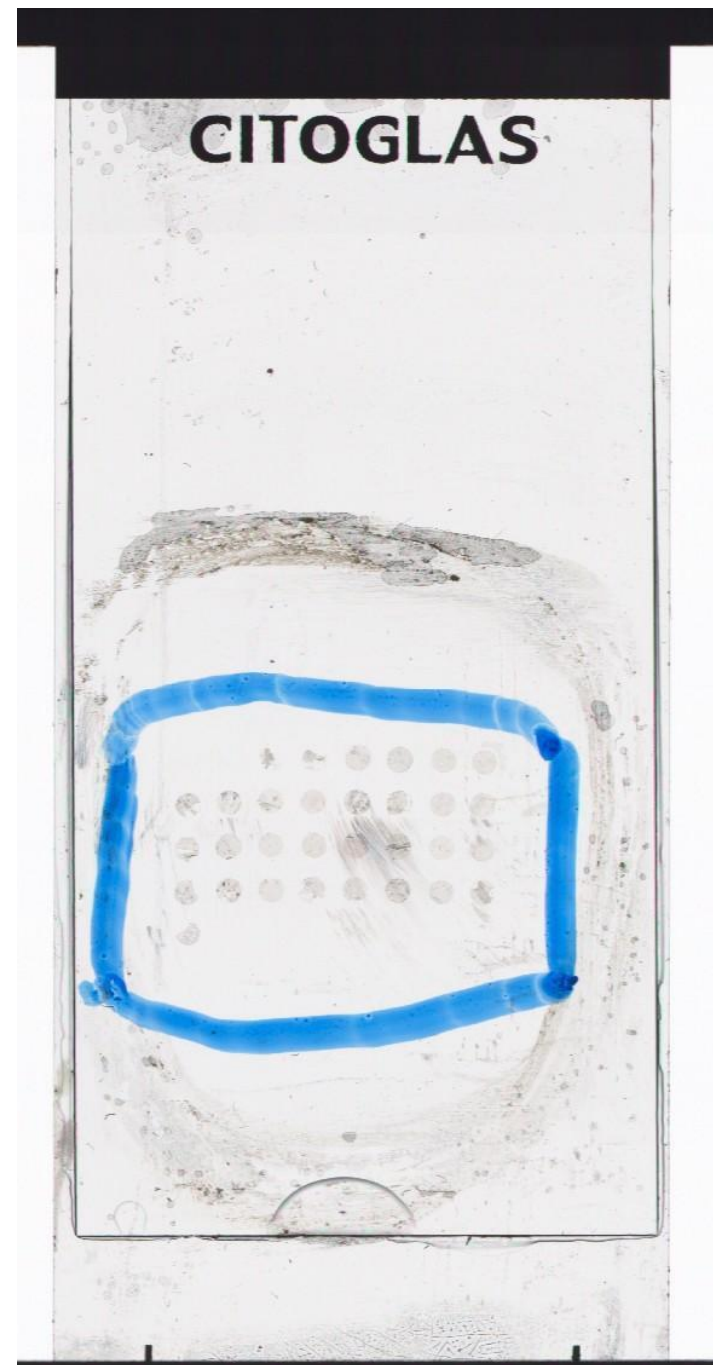

Supplement: MOESM2 [file 25352844]
